## 25 Introduction

26 The placenta is a transient organ that has critical roles during pregnancy, such as the  
27 transportation of oxygen and nutrients to the fetus, waste elimination, and the secretion of growth  
28 hormones. Placental defects are associated with devastating complications including  
29 preeclampsia and fetal growth restriction, which can lead to maternal or fetal mortality [1], [2].  
30 Therefore, it is fundamental to understand the mechanisms of placental development.

31 Due to ethical considerations as well as the opportunity for genetic manipulation, mouse  
32 models are frequently used when investigating early placental development. Like humans, mice  
33 have a hemochorial placenta [3], meaning that maternal blood directly comes in contact with the  
34 chorion. Although there are certain differences between the mouse and human placenta [3], [4],  
35 they do share common regulators and signaling pathways involved in placental development [4],  
36 [5]. For example, *Ascl2/ASCL2* [6], [7] and *Tfap2c/TFAP2C* [8] are required for the trophoblast  
37 (TB) cell lineage in both mouse and human models. Additionally, the HIF signaling pathway is  
38 conserved as it regulates TB differentiation in both mouse and human systems [9].

39 Mouse placental development begins around embryonic day (e) 3.5 when the  
40 trophoctoderm (TE) layer forms [5]. The TE differentiates into different TB populations at e4.5,  
41 which eventually leads to the formation of the ectoplacental cone (EPC) [10]. Between e7.5 and  
42 e9.5, the establishment of blood flow to the fetus begins, resulting in highly dynamic changes in  
43 placental cell composition. At e7.5, the EPC is comprised of TB cells [3], organized into the inner  
44 and peripheral populations, with the inner cells actively proliferating and differentiating, while the  
45 outer cells can be invasive and interact with the decidua [10]. Around e8.5, chorioallantoic  
46 attachment occurs, during which the chorion layer joins with the allantois [11]. As a result, the  
47 e8.5 mouse fetal placenta includes cells from the EPC, chorion and allantois [12]. From e9.5  
48 onwards, the mouse fetal placenta is composed of distinct layers, the trophoblast giant cell (TGC)  
49 layer, the junctional zone (spongiotrophoblast and glycogen TB cells), and the labyrinth zone  
50 (chorion TB cells, syncytiotrophoblast I and II cells, fetal endothelium, and spiral artery TGCs)  
51 [13], [14]. Within the labyrinth layer, there is a dense network of vasculature where nutrients and  
52 oxygen are transported and exchanged. Several individual regulators of the processes active  
53 between e7.5 and e9.5 have been identified, as reviewed in [5], [15]–[18].

54 In addition to identifying individual regulators governing placental functions, it is also  
55 important to determine how these regulators potentially interact with other genes as networks. In  
56 order to identify novel regulators or infer gene interactions underlying developmental processes,  
57 unbiased whole genome transcriptomic data can be used. Previous studies that utilized  
58 transcriptomics in the developing mouse placenta were either focused on analysis of one  
59 timepoint, or focused on analysis of multiple -omics data [19]–[22]. Other studies of gene

60 expression in human placenta across trimesters did not infer full gene interaction networks and  
61 instead focused on transcription factors [23], [24]. Single-cell analysis has been used to  
62 investigate cell-type specific gene expression in the placenta; however, these studies do not  
63 predict regulators underlying specific placental development processes [25], [26].

64 Here, we generated RNA sequencing (RNA-seq) data from mouse fetal placental tissues at  
65 e7.5, e8.5 and e9.5. We then carried out clustering, differential expression, and network analyses  
66 to infer gene interactions and predict novel regulators of placental development. We further  
67 demonstrated that our network constructions could be used to infer cell populations in the mouse  
68 placenta at the three timepoints. Finally, we conducted *in vitro* validation experiments and  
69 confirmed that several genes we identified have a role in regulating TB cell migration.

70

## 71 **Results**

### 72 **1. Genes associated with distinct placental processes show timepoint-specific expression**

73 We generated and analyzed transcriptomic data from fetal placental tissues at e7.5, e8.5  
74 and e9.5 to identify genes regulating distinct processes during placental development. Based on  
75 the stages of placental development and the cell types present at each stage, we predicted that  
76 genes with highest expression at e7.5 would be involved in TB proliferation or differentiation;  
77 genes with highest expression at e8.5 would have a role in chorioallantoic attachment; and genes  
78 with highest expression at e9.5 would have a role in the establishment of nutrient transport.  
79 Indeed, we observed that previously identified regulators of TB proliferation and differentiation  
80 (e.g., *Ascl2* [6], [27], *Gjb5* [28]), chorioallantoic attachment (e.g., *Ccnf* [29], *Itga4* [30]), and  
81 nutrient transport (e.g., *Gjb2* [31], *Igf2* [32]) showed timepoint-specific patterns that matched with  
82 our predictions (Figure 1A). Next, we performed hierarchical clustering (see Materials and  
83 Methods) to determine if protein-coding transcripts would cluster into groups that displayed  
84 timepoint-specific expression. From this analysis, we obtained three groups of transcripts in which  
85 the median expression was highest at e7.5 (8242 transcripts, equivalent to 5566 genes), e8.5  
86 (8091 transcripts, equivalent to 5536 genes) and e9.5 (7238 transcripts, equivalent to 5347  
87 genes) (Figure 1B, Supplementary Table S1). Hereafter, these groups are referred to as  
88 hierarchical clusters.

89 To evaluate the computational robustness and biological significance of the hierarchical  
90 clusters, we carried out additional analyses. First, we validated the grouping patterns using three  
91 different algorithms, K-means clustering, self-organizing maps, and spectral clustering, and  
92 observed similar trends (Supplementary Figure S1). Second, we determined how the genes in  
93 each cluster relate to processes of placental development. From previously published review

94 articles [5], [15]–[18], we acquired gene sets associated with distinct processes, namely  
95 *ectoplacental cone and/or spongiotrophoblast maintenance* (expected to be most active at e7.5,  
96 when the EPC is still in a highly proliferative state [10]), *trophoblast giant cell differentiation*  
97 (expected to be more active at e7.5 because the mouse placenta at e8.5 and e9.5 includes more  
98 differentiated TB subtypes [3], [12]–[14]), *chorioallantoic attachment* (expected to be most active  
99 at e8.5 [11]), and *labyrinth branching, vascularization and syncytiotrophoblast differentiation*  
100 (expected to be most active at e9.5, after these processes have initiated [18]) (Supplementary  
101 Table S2). Indeed, we observed that the e7.5 hierarchical cluster captured the most genes in the  
102 *ectoplacental cone and spongiotrophoblast maintenance* and *trophoblast giant cell differentiation*  
103 group; the e8.5 hierarchical cluster included the most genes in the *chorioallantoic attachment*  
104 group; and the e9.5 hierarchical cluster included the most genes in the *labyrinth branching,*  
105 *vascularization and syncytiotrophoblast differentiation* group (Figure 1C, Supplementary Table  
106 S2). Together, these data demonstrate that hierarchical clustering can be used to obtain transcript  
107 groups that are associated with relevant biological processes at each timepoint, but is not  
108 sufficient to fully distinguish processes that may have varied activity levels throughout time.

109 To this end, and because hierarchical clustering is sensitive to small perturbations in the  
110 datasets [33], we carried out differential expression analysis (DEA) and identified transcripts and  
111 genes with the strongest changes over time (Supplementary Figure S2, Supplementary Table  
112 S3). After combining results from hierarchical clustering and DEA, we defined timepoint-specific  
113 gene groups (see Materials and Methods for gene group definitions, Supplementary Figure S2)  
114 and obtained 922 e7.5-specific genes, 915 e8.5-specific genes, and 1952 e9.5-specific genes  
115 (Supplementary Table S4). These timepoint-specific groups were further analyzed to predict gene  
116 interactions and functions.

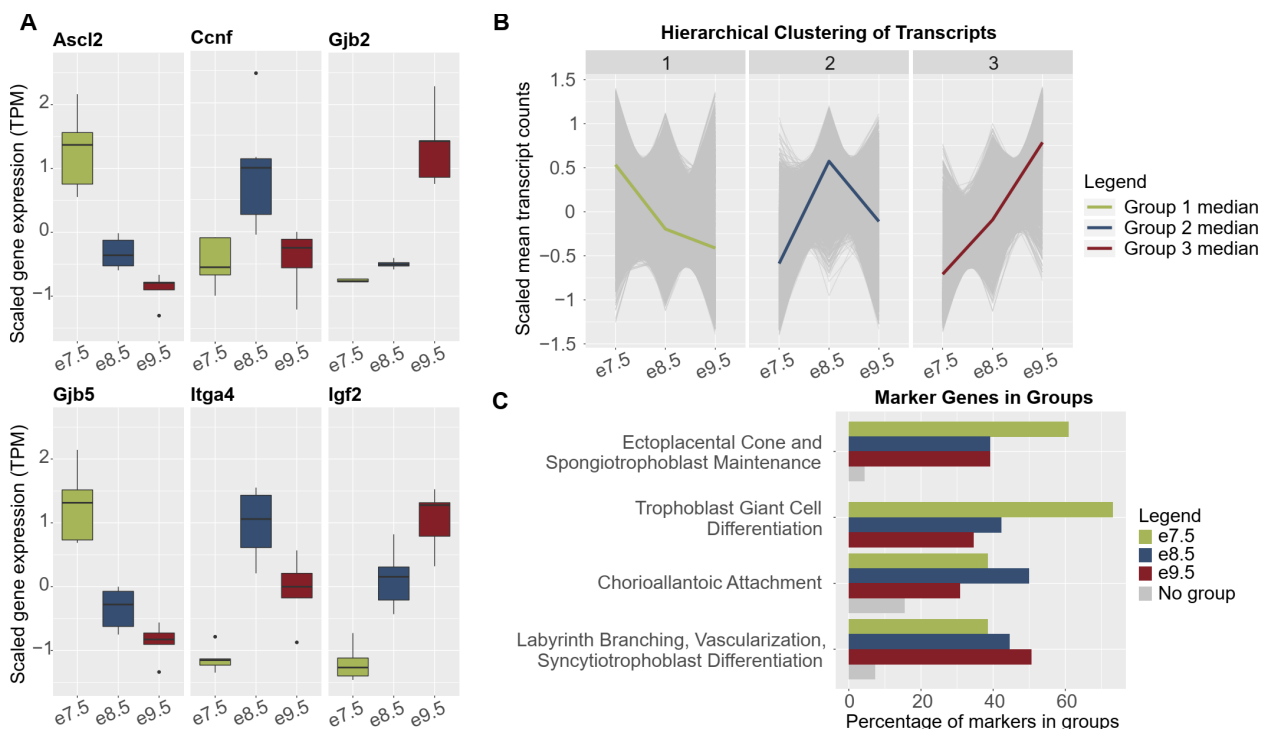

117

118

119

120

121

122

123

124

125

126

127

128

129

130

131

## 2. Network analysis reveals potential regulators of developmental processes in the placenta

132

133

134

135

136

137

138

To predict interactions amongst timepoint-specific genes and subset timepoint-specific genes into regulatory modules, we used the STRING database [35] and GENIE3 [36] (see Materials and Methods). With the two approaches of network inference, we were able to predict networks of genes by means of previously published experimental results and text-mining of available publications (STRING), as well as *de novo* computational analysis with random forest-based methods (GENIE3). We then carried out network sub-clustering with the GLayer algorithm [37] (see Materials and Methods) and identified four network modules at e7.5, six at e8.5, and

139 eight at e9.5 (Supplementary Table S5). To determine if the networks were associated with  
140 distinct processes of placental development, we used gene ontology (GO) enrichment analysis.

141 Compared to e8.5 and e9.5 networks, e7.5 networks had a higher rank or fold change for  
142 the GO terms “inflammatory response” and “female pregnancy” (Figure 2A). The term  
143 “morphogenesis of a branching structure”, which can be expected following choriollantoic  
144 attachment around e8.5, was not enriched at e7.5, but was enriched in multiple e8.5 and e9.5  
145 networks (e8.5\_1\_STRING, e8.5\_2\_GENIE3, e9.5\_1\_STRING, e9.5\_1\_GENIE3,  
146 e9.5\_2\_STRING, and e9.5\_2\_GENIE3). After chorioallantoic attachment finishes, nutrient  
147 transport is being established. Accordingly, we observed the following enrichments: “endothelial  
148 cell proliferation” (highest ranked in e9.5\_2\_STRING), “lipid biosynthetic process” (only significant  
149 after e7.5, highest ranked in e9.5\_3\_STRING), “cholesterol metabolic process” (only significant  
150 after e7.5, highest ranked in e9.5\_2\_GENIE3 and e9.5\_3\_STRING), and “response to insulin”  
151 (only significant after e7.5, highest ranked in e9.5\_1\_GENIE3). “Tube morphogenesis”,  
152 “vasculature development” and cell migration related terms (“positive regulation of cell migration”  
153 and “epithelium migration”) are observed in networks at all timepoints, although these terms are  
154 not consistently ranked in all networks. Supplementary Table S6 includes the full list of significant  
155 terms observed.

156 We predicted that hub genes, defined to be nodes with high degree, closeness, and shortest  
157 path betweenness centrality in the networks (see Materials and Methods), could be potential  
158 regulators of developmental processes in the placenta. We first determined if the hub genes from  
159 each network described in the previous paragraph were annotated with placental functions using  
160 the Mouse Genome Informatics (MGI) database [38] (see Materials and Methods, Table 1,  
161 Supplementary Table S7). In the network e7.5\_1\_STRING, we identified seven hub genes (Table  
162 1), none of which were annotated to terms related to placental development according to the MGI  
163 database. In the network e7.5\_2\_GENIE3 (Figure 2B), ten hub genes were identified, three of  
164 which were annotated in the MGI database, and are required for TB proliferation, differentiation,  
165 migration or invasion, namely *Nr2f2* [39], *Prdm1* [40], and *Ctbp2* [41] (Table 1, Supplementary  
166 Table S7). However, upon further literature search, we found that the two networks’ hub genes  
167 include genes that have an established role in placental development that are not annotated by  
168 MGI, such as *Mmp9* (e7.5\_1\_STRING), *Hmox1* and *Satb1* (e7.5\_2\_GENIE3), which are required  
169 for proper implantation, TB differentiation and invasion [42], [43], [44]. Other hub genes could be  
170 novel regulators of placental functions. One example is *Frk*, a hub gene of the e7.5\_2\_GENIE3  
171 network, which had been suggested to inhibit cell migration and invasion in human glioma [45]  
172 and retinal carcinoma cells [46], but has not been studied in early placental development.



173 At e8.5, hub genes included both novel and known genes in placental development or  
174 chorioallantoic attachment. For example, in the network e8.5\_1\_STRING, 11 hub genes were  
175 identified, of which three were associated with placental development according to the MGI  
176 database. These genes, *Akt1*, *Mapk1*, and *Mapk14*, all have a role in placental vascularization  
177 [47]–[49] (Table 1, Supplementary Table S7). For the network e8.5\_2\_GENIE3 (Figure 2B), there  
178 were 17 hub genes identified (Table 1, Supplementary Table S7), with three genes annotated with  
179 placenta related terms in MGI and associated with placental development processes such as  
180 placental vascularization (*Setd2* [50]). Both networks' hub genes include genes that are not  
181 annotated to placental function related terms, but have been studied in the context of placental  
182 development such as *Adam10* [51] and *Creb1* [52] (e8.5\_1\_STRING), *Dnmt1* [53], *Dnmt3b* [54],  
183 *Lin28a* [55], *Vgll1* [56], and *Msx2* [57] (e8.5\_2\_GENIE3). An example of a novel gene is *Jade1*  
184 (hub node of e8.5\_2\_GENIE3), which has been found to have high expression in extraembryonic  
185 ectoderm and TB cells and hence may play roles in placental vascularization by interacting with  
186 VHL [58], but has not been tested functionally in placental tissues.

187 From the e9.5 networks, we identified 127 hub genes of which 16 have been annotated as  
188 having a role in placental development in the MGI database (Table 1, Supplementary Table S7).  
189 For instance, in e9.5\_1\_GENIE3, e9.5\_2\_STRING, and e9.5\_4\_STRING, hub genes that regulate  
190 labyrinth layer development include *Egfr* [59] and *Rb1* [60], and hub genes that regulate placental  
191 vasculature development include *Fn1* [61] and *Vefga* [62]. The hub genes from these networks  
192 again include genes that are not annotated with placental development terms, but have a known  
193 role in placental development such as *Wnt5a* [63] (e9.5\_1\_STRING), *Ets1* [64] (e9.5\_2\_GENIE3),  
194 and *Cebpb* [65] (e9.5\_3\_GENIE3). There are also hub genes known to be important for placental  
195 nutrient transport such as *Igf2* [32], and other genes that could be novel regulators. For example,  
196 *Lhx2* is part of the mTOR signaling pathway in osteosarcoma [66], but has yet to be studied in  
197 placenta although the mTOR signaling pathway is known to be involved in nutrient transport in the  
198 placenta [67].

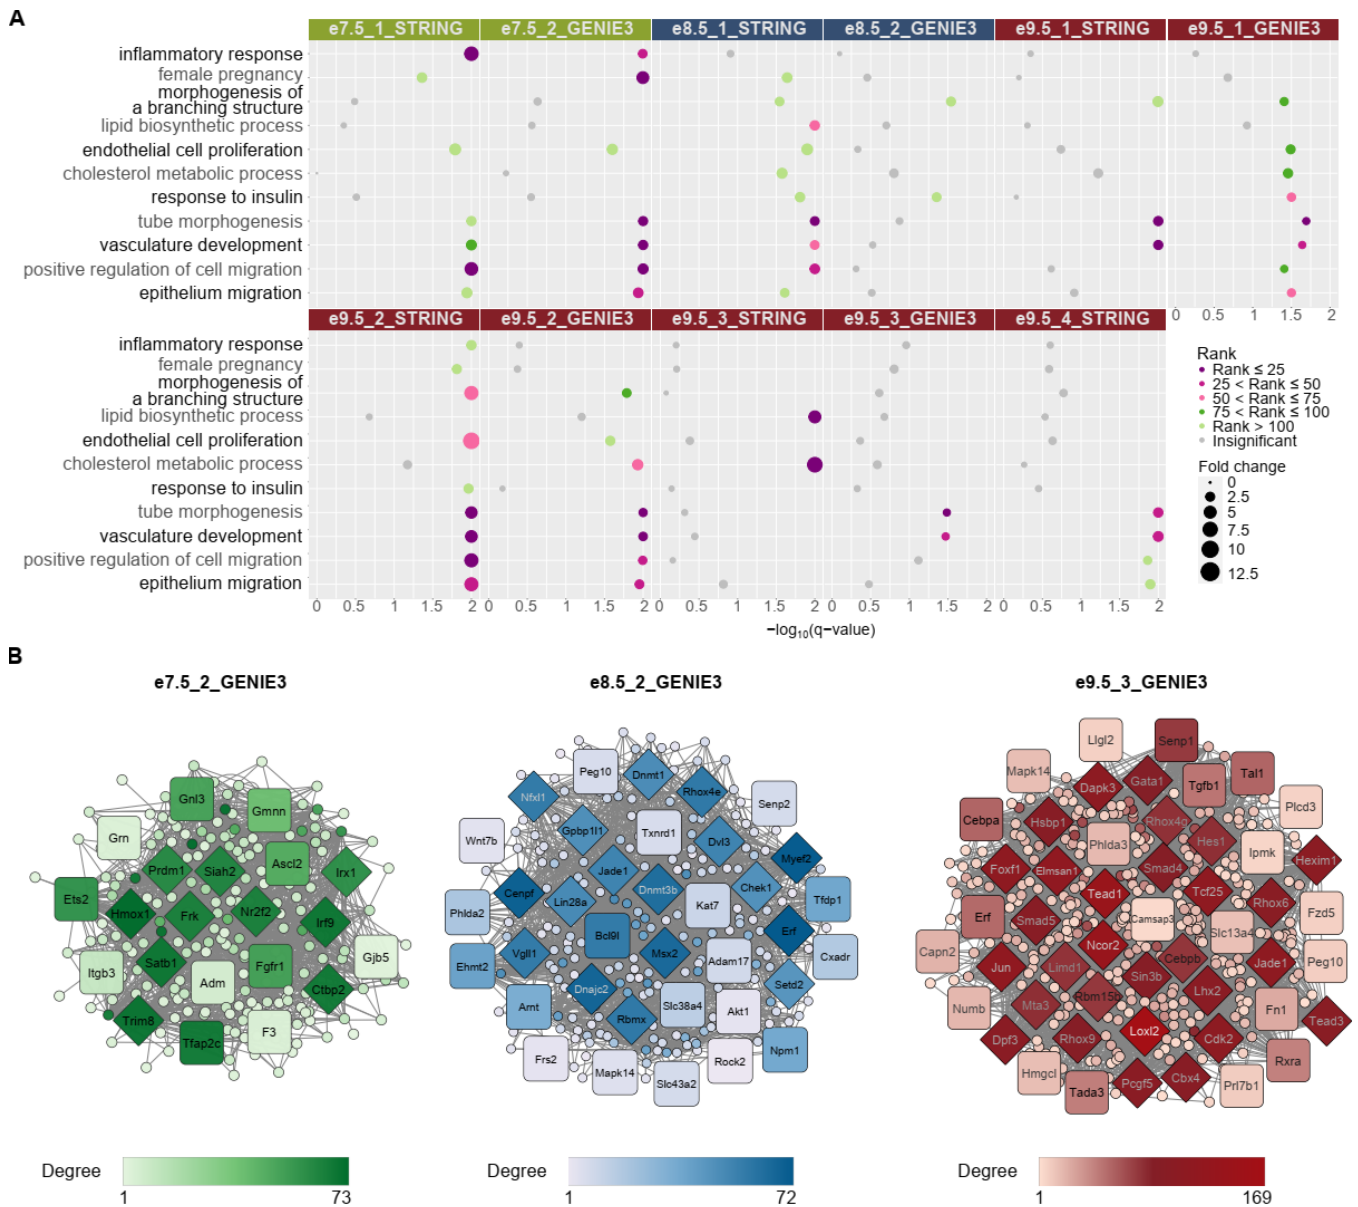

199

200

201

202

203

204

205

206

207

208

209

210

211

212

Figure 2: Network analysis identifies gene modules with relevant functions and reveals potential regulators of placental development.

**A.** Gene ontology (GO) analysis of networks demonstrates the association of gene sets with placental development processes. Only selected terms are shown. Dot colors correspond to ranks of the terms in each analysis; dot sizes correspond to fold change. A GO term is considered enriched if its  $q$ -value  $\leq 0.05$ , fold change  $\geq 2$ , and the number of observed genes  $\geq 5$ . For full GO enrichment analysis, see Supplementary Table S6. **B.** Network analysis highlights potential regulators of placental development. Only a subset of networks with enriched terms from (A) are shown. Square shaped nodes: genes annotated with placental functions on the MGI database (see Materials and Methods). Diamond shaped nodes: hub genes. Color: the darker the color is, the higher the node's degree centrality is.

### 3. Timepoint-specific genes can be associated with cell-specific expression profiles of human placenta



213 To determine if timepoint-specific genes could capture different placental cell populations,  
214 we carried out deconvolution analysis with LinSeed [68] and inferred the cell type profiles. Briefly,  
215 LinSeed takes advantage of the mutual linearity relationships between cell-specific genes and  
216 their corresponding cells to infer the topological structures underlying cell populations of tissues.  
217 This approach would enable us to use bulk RNA-seq data to predict proportions of cell types in  
218 the mouse placenta without prior knowledge of cell type markers or matching single-cell datasets.  
219 As input to LinSeed, we used the 5000 most highly expressed genes across all timepoints  
220 (expression in TPM), from which 1413 genes were found to be statistically significant for the  
221 inference models and thus used to conduct the deconvolution analysis (see Materials and  
222 Methods, Supplementary Figure S3). As a result, we observed five cell groups which captured  
223 99% of the variance in the placenta tissue samples (Supplementary Figure S3). Amongst these  
224 groups, e7.5 samples had the highest proportion of cell group 3, e8.5 samples had highest  
225 proportion of cell group 2, and e9.5 samples had highest proportion of cell group 5 (Figure 3A –  
226 left panel, Supplementary Table S8). Cell group 1 and cell group 4 did not have consistent cell  
227 proportions across biological replicates of a single timepoint. The identification of these cell  
228 groups could have resulted from noise introduced by both biological and technical variation, which  
229 is challenging to overcome when using a small sample size in the deconvolution analysis.  
230 Therefore, we focused on cell groups 3, 2 and 5. We identified 100 markers (see Materials and  
231 Methods) for cell group 3, 100 markers for cell group 2, and 41 markers for cell group 5.  
232 Interestingly, 95 of the 100 markers of cell group 3 are e7.5-specific genes, 45 out of 100 markers  
233 of cell group 2 are e8.5-specific genes, and 40 in the 41 markers of cell group 5 are e9.5-specific  
234 genes (Figure 3A – right panel, Supplementary Table S8). This indicates that the independent  
235 timepoint-specific gene analysis we performed in Section 2 could represent gene profiles of  
236 distinct cell populations.

237 To this end, we used the PlacentaCellEnrich webtool to annotate timepoint-specific genes  
238 with human placental cell types [69]. At all timepoints, we observed enrichment suggesting the  
239 presence of TB cells. Specifically, the e7.5-specific genes were most significantly enriched for  
240 genes with extravillous trophoblast (EVT)-specific expression ( $\log_2(\text{fold}) = 1.75$ ,  $-\log_{10}(\text{adj. p-value}) = 4.18$ ), but also had enrichment for syncytiotrophoblast (SCT) ( $\log_2(\text{fold}) = 1.1$ ,  $-\log_{10}(\text{adj. p-value}) = 2.09$ ); the e8.5-specific group was only enriched for genes that had villous  
243 cytotrophoblast (VCT)-specific expression ( $\log_2(\text{fold}) = 1.51$ ,  $-\log_{10}(\text{adj. p-value}) = 2.36$ ), and the  
244 e9.5-specific group had the highest enrichment for genes with fetal fibroblast-specific expression  
245 ( $\log_2(\text{fold}) = 2.04$ ,  $-\log_{10}(\text{adj. p-value}) = 22.04$ ) (Figure 3B, Supplementary Figure S4). We note  
246 that the e9.5-specific group had enrichment for genes with cell-type specific expression in multiple  
247 cells, including endothelial cells ( $\log_2(\text{fold}) = 2.02$ ,  $-\log_{10}(\text{adj. p-value}) = 18.66$ ), VCT ( $\log_2(\text{fold}) =$   
248  $1.5$ ,  $-\log_{10}(\text{adj. p-value}) = 7.38$ ), SCT ( $\log_2(\text{fold}) = 1.23$ ,  $-\log_{10}(\text{adj. p-value}) = 6.93$ ), and EVT

249 (log<sub>2</sub>(fold) = 1.05, -log<sub>10</sub>(adj. p-value) = 3.05) (Figure 3B, Supplementary Figure S4). Together,  
250 this demonstrates that our analysis is picking up on the diverse cell populations present at e9.5  
251 compared to e7.5.

252 Motivated by the fact that cell-specific expression profiles for multiple human placental cell  
253 types are enriched at e7.5 and e9.5, we hypothesized that the gene network modules at each  
254 timepoint could capture specific cell populations. Indeed, PlacentaCellEnrich analysis on  
255 e7.5\_2\_GENIE3 network genes was significantly enriched for genes with EVT-specific expression  
256 (log<sub>2</sub>(fold) = 2.32, -log<sub>10</sub>(adj. p-value) = 1.67) (Figure 3C, Supplementary Figure S4), but no longer  
257 with genes that have SCT-specific expression. e8.5\_1\_STRING and e8.5\_2\_GENIE3 were both  
258 enriched for genes with VCT-specific expression (log<sub>2</sub>(fold) = 2.35 and 3, -log<sub>10</sub>(adj. p-value) =  
259 1.43 and 5.41, respectively). In addition to VCT-specific expression, e8.5\_2\_GENIE3 had  
260 enrichment for genes that had SCT-specific expression (log<sub>2</sub>(fold) = 2.19, -log<sub>10</sub>(adj. p-value) =  
261 2.93) (Figure 3C, Supplementary Figure S4). At e9.5, genes in the networks e9.5\_1\_GENIE3 and  
262 e9.5\_3\_STRING showed strong enrichment for TB-specific expression, such as in SCT and VCT.  
263 On the other hand, e9.5\_2\_GENIE3, e9.5\_2\_STRING, e9.5\_3\_GENIE3 and e9.5\_4\_STRING had  
264 strong enrichment for fetal fibroblast and endothelium expression profiles (Figure 3C,  
265 Supplementary Figure S4).

266 For genes in network e7.5\_1\_STRING, e9.5\_1\_STRING, and e9.5\_3\_GENIE3, we did not  
267 observe any enrichment for fetal placental cells, possibly because not all genes in the networks  
268 are annotated in the 1<sup>st</sup> trimester dataset [70] used when calculating cell enrichments in  
269 PlacentaCellEnrich. Therefore, we also used Placenta Ontology [71], which carries out  
270 enrichment tests based on different datasets than those used in PlacentaCellEnrich. With  
271 e7.5\_1\_STRING, in agreement with previous analyses on e7.5-specific genes or genes in  
272 e7.5\_2\_GENIE3 network, we observed annotations related to EVT cells being enriched, such as  
273 “EVT > side population” (log<sub>2</sub>(fold) = 1.99 and false discovery rate (FDR) = 0.027), and “EVT >  
274 CT” (log<sub>2</sub>(fold) = 1.96, FDR = 0.028) (Supplementary Table S9). With e9.5\_1\_STRING, the term  
275 “EGFR+ VCT > ITGA2+ TB niche” was enriched (log<sub>2</sub>(fold) = 1.89, FDR = 0.023), meaning there  
276 are a significant number of genes in this network that were upregulated in EGFR+ VCT compared  
277 to the ITGA2+ proliferative TB niche in 1<sup>st</sup> trimester placenta. Similarly, with e9.5\_3\_GENIE3, we  
278 found the term “EGFR+ VCT > HLA-G+ EVCT” enriched (log<sub>2</sub>(fold) = 1.5, FDR = 0.043), which  
279 means there is a significant number of genes in this network that were upregulated in EGFR+  
280 VCT compared to HGL-A+ proximal column extravillous cytotrophoblast in 1<sup>st</sup> trimester placenta.  
281 In the other networks, Placental Ontology enrichment results generally agreed with  
282 PlacentaCellEnrich (Supplementary Table S9). Together, the PlacentaCellEnrich and Placenta

283  
284

Ontology analyses provide evidence that network analysis can be used to identify genes more likely associated with specific placental cell types.

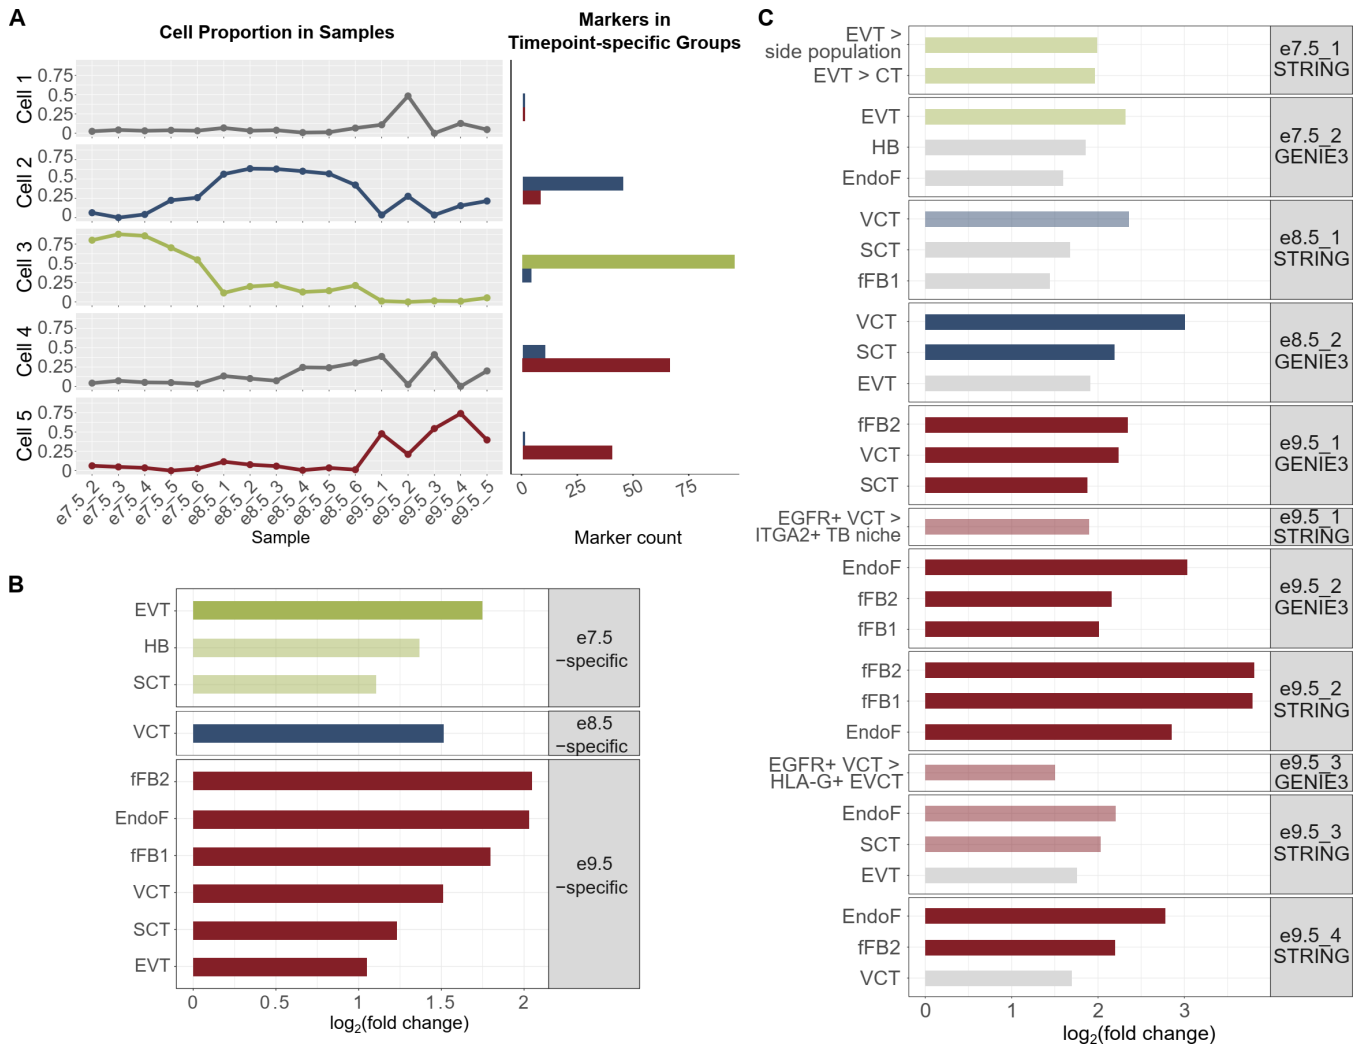

285

286

287

288

289

290

291

292

293

294

295

296

297

298

299

Figure 3: Timepoint-specific gene groups can be associated with human placenta cell-specific expression profiles.

**A.** Deconvolution analysis using LinSeed showed five cell groups, three of which had highest proportions in e7.5 samples (group 3), e8.5 samples (group 2) and e9.5 samples (group 5). Also using LinSeed, we identified markers of each cell group and observed a high number of genes in common with timepoint-specific genes (cell group 3 with e7.5-specific genes, cell group 2 with e8.5-specific genes, cell group 5 with e9.5-specific genes). Left panel: line charts showing cell proportions in each sample; right panel: bar plots showing the number of cell markers in each timepoint-specific gene group. **B.** Bar plots showing that timepoint-specific genes share similar profiles to these of human placental cell populations. Enrichment analysis was carried out with PlacentaCellEnrich using 1<sup>st</sup> trimester human placenta single-cell RNA-seq data to determine gene groups with cell-type specific expression. A significant enrichment has adj. p-value  $\leq 0.05$ , fold change  $\geq 2$ , and number of observed genes  $\geq 5$ . The lightness of the colors corresponds to adj. p-value; the lighter colors,  $0.005 < \text{adj. p-value} \leq 0.05$ ; the darker colors,  $\text{adj. p-value} \leq 0.005$ . Only enrichments for cells of fetal origin are shown. Full enrichment results (including both maternal and fetal

300 cells) are shown in Supplementary Figure S4. **C.** Bar plots showing that network genes share similar  
301 profiles of specific human placental cell populations. Enrichment analysis was carried out with  
302 PlacentaCellEnrich as in (B) and Placental Ontology. Grey, adj. p-value > 0.05; the lighter colors, adj. p-  
303 value ≤ 0.05; the darker colors: adj. p-value ≤ 0.005. For PlacentaCellEnrich, three fetal cell types with the  
304 lowest adj. p-values are shown. For Placenta Ontology, selected enrichments are shown. Full enrichment  
305 results (including both maternal and fetal cells and for every network) of PlacentaCellEnrich are shown in  
306 Supplementary Figure S4. Full enrichment results (for every network) of Placenta Ontology are in  
307 Supplementary Table S9. **Abbreviations:** SCT, syncytiotrophoblast, HB, Hofbauer cells, EVT, extravillous  
308 trophoblast, VCT, villous cytotrophoblast, EndoF, fetal endothelium, fFB1, fetal fibroblast cluster 1, fFB2,  
309 fetal fibroblast cluster 2, EVT > side population, GSE57834\_extravillous\_trophoblast\_UP\_side\_population  
310 (genes upregulated in EVT compared to side population – original data from GSE57834), EVT > CT,  
311 GSE57834\_extravillous\_trophoblast\_UP\_cytotrophoblast (genes upregulated in EVT compared to  
312 cytotrophoblast – original data from GSE57834), EGFR+ VCT > ITGA2+ TB niche,  
313 GSE106852\_EGFR+\_UP\_ITGA2+ (genes upregulated in EGFR+ villous cytotrophoblast compared to  
314 ITGA2+ proliferative trophoblast niche, original data from GSE106852), EGFR+ VCT > HLA-G+ EVCT,  
315 GSE80996\_EGFR+\_villous\_cytotrophoblast\_UP\_HLA\_G+\_proximal\_column\_extravillous\_cytotrophoblast  
316 (genes upregulated in EGFR+ villous cytotrophoblast compared to HLA-G+ proximal column extravillous  
317 cytotrophoblast, original data from GSE80996).

318

#### 319 **4. Gene knockdown provides further evidence for a role of network genes in the placenta**

320 As described in Section 2, we identified hub nodes, and as a result also obtained genes  
321 directly connected to the hub nodes (Supplementary Table S7). Many of the genes (23 genes at  
322 e7.5, 208 genes at e9.5) had drastic expression changes over time (having at least one transcript  
323 with fold change ≥ 5 between e7.5 and e9.5) (Supplementary Table S10), which may be more  
324 likely to have regulatory roles specific to processes or cell types associated to each timepoint.  
325 However, there were a number of hub genes and genes directly connected to the hub nodes that  
326 were differentially expressed but had lower fold changes and showed high expression across all  
327 timepoints. We predict these highly expressed genes to be generally important for TB function  
328 and processes such as cell migration, a term that was associated with multiple timepoint specific  
329 networks (Figure 2A).

330 To investigate this further, we performed gene knockdown and migration assays for four  
331 candidate genes from four different networks in the HTR-8/SVneo cell line, an established model  
332 for studying TB migration [72]–[74]. From the lists of hub genes and their directly connected  
333 nodes (Supplementary table S7), we obtained genes that met the following criteria: having  
334 expression levels > 5 TPM in the mouse placenta transcriptome data we generated, having  
335 expression levels > 5 FPKM (fragments per kilobase of transcript per million of mapped reads) in

336 human TB cell lines [75] and having expression levels > 20 TPM in HTR-8/SVneo cell line [20]  
337 (Supplementary Table S7). From this list, we selected four genes: *Mtdh* and *Siah2* (from the  
338 e7.5\_1\_STRING and e7.5\_2\_GENIE3 network, respectively), *Hnrnpk* (from the e8.5\_2\_GENIE3),  
339 and *Ncor2* (from the e9.5\_2\_GENIE3), none of which have been studied in TB migration function.  
340 Of note, all of the networks from which we selected candidate genes were annotated to represent  
341 TB subtype populations (see Section 3).

342 For each of the four genes we transfected two different siRNAs, and all eight siRNAs  
343 resulted in high knockdown efficiencies (74 – 93%, Figure 4A). Next, we performed cell migration  
344 assays and observed a reduction in cell migration capacity for all four genes, as determined  
345 through quantification of integrated cell densities (Figure 4B, C, Supplementary Figure S5,  
346 Supplementary Table S11). For *Siah2* and *Hnrnpk*, integrated densities of cells were significantly  
347 decreased upon knockdown with both siRNAs (p-value  $\leq 0.05$ ). Specifically, for *Siah2*, the  
348 densities reduced by  $98.57\% \pm 0.42\%$  (mean  $\pm$  standard error) and  $83.87\% \pm 12.1\%$  with siRNA  
349 #1 and siRNA #2, respectively. For *Hnrnpk*, the densities reduced by  $99.55\% \pm 0.09\%$  with siRNA  
350 #1 and  $98.68\% \pm 0.2\%$  for siRNA #2. For *Mtdh* and *Ncor2*, the reductions were significant for one  
351 siRNA (*Mtdh*, siRNA #2,  $98.55\% \pm 0.86\%$ ; *Ncor2*, siRNA #1,  $98.11\% \pm 0.09\%$ ), and were fair for  
352 the other siRNA, likely due to the variable results between biological replicates (*Mtdh*, siRNA #1,  
353  $55.28\% \pm 17.22\%$ ; *Ncor2*, siRNA #2,  $81.27\% \pm 14.04\%$ ). Overall, these results confirm that  
354 network analysis and gene filtering based on defined criteria can identify genes important for TB  
355 function.



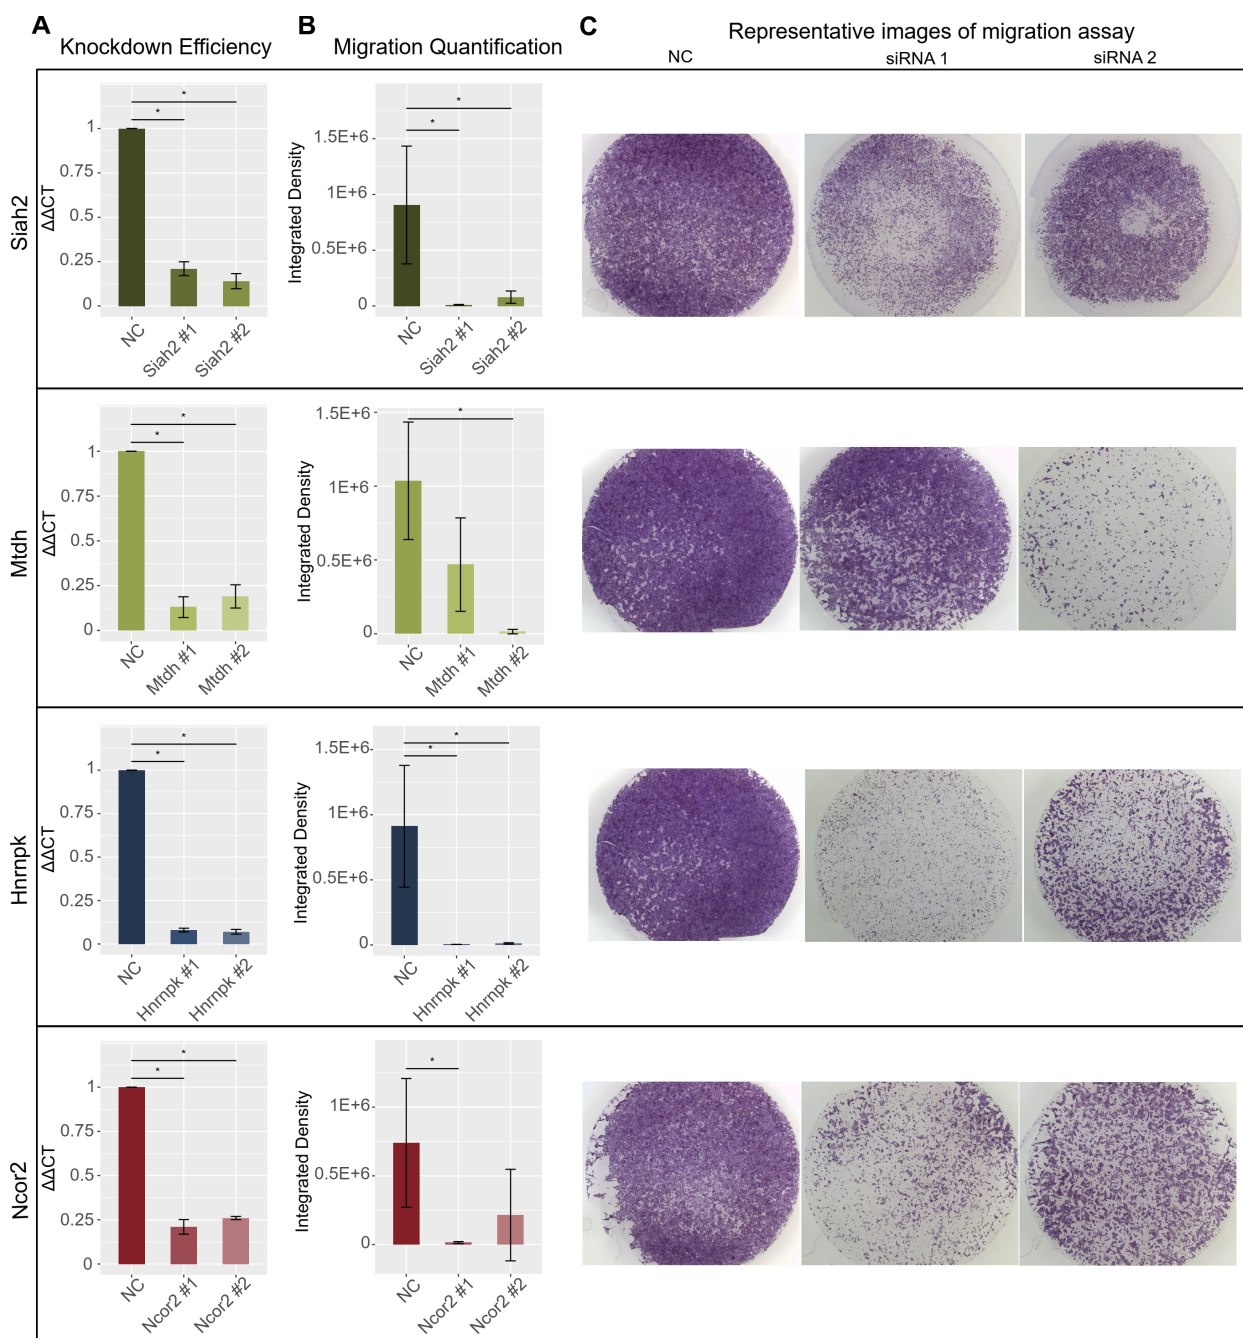

356

357

358

359

360

361

362

363

364

365

366

Figure 4: Gene knockdown of selected network genes showing reduction in cell migration capacity.

Panels correspond to four genes, *Siah2*, *Mtdh*, *Hnrnpk* and *Ncor2*. Each condition, negative control (NC), siRNA #1 and siRNA #2, had three biological replicates. Error bars show standard deviation.

**A.** Bar plots showing that gene expression was significantly reduced after knockdown (KD) compared to NC. *GAPDH* was used for normalization of all four genes' expression ( $\Delta\text{CT}$ ). Percent KD were calculated with the  $\Delta\Delta\text{CT}$  method. Values shown were normalized to the NC siRNAs. Y-axis shows  $\Delta\Delta\text{CT}$  value.

Details of KD efficiencies, siRNAs, and primer sequences can be found in Supplementary Table S11 and S12. (\*) indicates  $p$ -value  $< 0.05$ . **B.** Bar plots showing significant reduction in the integrated density of cells after knockdown (KD) compared to NC samples. Y-axis shows integrated densities of cells in NC samples, samples KD with siRNA #1 of each gene, and samples KD with siRNA #2 of each gene. Details of



367 integrated densities can be found in Supplementary Table S11. (\*) indicates p-value < 0.05. **C.**  
368 Representative images of migration assays. Left, NC samples; middle, siRNA #1 samples; right, siRNA #2  
369 samples.

370

## 371 **Discussion**

372 Placenta development involves multiple processes that are active during different stages of  
373 gestation. Using transcriptomic data generated from mouse placenta at e7.5, e8.5 and e9.5, we  
374 identified timepoint-specific gene groups that can be used for gene network inferences and  
375 analyses, as well as cell population annotations. Importantly, we were able to infer cell  
376 populations at different timepoints without known marker genes or reference dataset from the  
377 same species. The cell proportion inferences were necessary to bypass the confounding factors  
378 from cell heterogeneity, and thus predict more accurate novel regulators of cell-specific processes  
379 such as TB cell migration. This computational pipeline could be used to infer and analyze gene  
380 networks governing the development of placenta at other timepoints or to study developmental  
381 processes in other tissues.

382 We carried out DEA across the three timepoints on both the transcript and the gene level.  
383 These analyses revealed that a gene may have transcripts that are differentially expressed at  
384 different timepoints. For example, *Igf2*, a placental nutrient transport marker [76], has different  
385 transcripts grouped to e8.5 and e9.5 (Supplementary Table S1). This observation also aligned  
386 with a recent study which showed in 6–10 weeks' and 11–23 weeks' human placenta,  
387 differentially expressed genes, transcripts or differential transcript usage could all assist in the  
388 understanding of placental development [77]. Therefore, in future studies, investigating roles of  
389 both genes and their transcripts could give a more complete functional profile at each timepoint.  
390 Moreover, our results, together with previous studies in human placenta [23], [24], [77], suggest  
391 that time series transcriptomic analyses could be a useful approach to identify genes governing  
392 the development of the placenta. It will be beneficial to integrate these time series datasets to  
393 determine species-specific biomarkers of placental development.

394 We identified hub genes and their immediate neighboring genes which could regulate  
395 placental development and confirmed the regulatory roles of four novel genes (*Mtdh*, *Siah2*,  
396 *Hnmpk* and *Ncor2*) in cell migration in the HTR-8/SVneo cell line. Interestingly, all four genes  
397 have been shown to have roles in cancer cells: *Siah2* was shown to promote cell invasiveness in  
398 human gastric cancer cells by interacting with ETS2 and *TWIST1* [78]; *Mtdh* regulates  
399 proliferation and migration of esophageal squamous cell carcinoma cells [79]; absence of *Hnmpk*  
400 reduces cell proliferation, migration and invasion ability in human gastric cancer cells [80]; and  
401 repression of *NCOR2* and *ZBTB7A* increased cell migration in lung adenocarcinoma cells [81].

402 This result further supports previous studies that show the comparability between placental cell  
403 migration and invasion, and tumor cell migration and invasion [71], [82], although specific genes  
404 may have different impacts on migration/invasion capacity such as with the *Ncor2* gene. We  
405 acknowledge the HTR-8/SVneo cell line bears certain differences to TB cells such as in their  
406 miRNA expression profiles [83]. Therefore, in order to determine the exact roles of these genes in  
407 the placenta, future experiments such as migration assays in human TB stem cells derived with  
408 the Okae protocol [75] or gene knock out experiments *in vivo* would be necessary.

409 In our analyses, we observed that timepoint-specific genes and their networks represented  
410 expression profiles for specific placental cell populations at the three timepoints. In particular,  
411 analysis of e7.5-specific and e8.5-specific genes and networks showed that placental tissues at  
412 e7.5 and e8.5 contain different populations of TB cells, while e9.5-specific genes and networks  
413 showed multiple cell types including TB, endothelial and fibroblast cells. The significant overlap  
414 between e7.5-specific genes and genes of EVT cells yielded an interesting suggestion that the TB  
415 cell populations in e7.5 mouse placenta may share similarity in gene profiles to human EVT,  
416 although mouse TB and human EVT have certain differences such as their invasiveness levels  
417 [9]. Examples of EVT genes present in e7.5-specific gene group include *FSTL3* (downregulation  
418 decreased TB migration and invasion in JAR cell line [84]), *ADM* (increased TB migration and  
419 invasion in JAR and HTR-8/SVneo cell line [85]), and *ASCL2* (regulates TB differentiation [6]).

420 Furthermore, while it is true that single-cell (sc) resolution data is necessary to gain more  
421 information about the cell populations in the tissues, these results showed strong evidence that  
422 bulk RNA-seq data could be used to infer the cell type composition. In addition, scRNA-seq  
423 assays could be noisier than bulk RNA-seq due to various technical aspects such as the amount  
424 of starting materials, cell size, cell cycle, and batch effects [86], [87], which are difficult to be  
425 corrected for [88]. Therefore, bulk RNA-seq, ideally in conjunction with scRNA-seq, is beneficial  
426 for the study of biological processes that involve multiple cell types.

427 In our network analysis, we observed that the GO term “inflammatory response” was  
428 enriched in e7.5\_1\_STRING (q-value = 1.52E-23), e7.5\_2\_GENIE3 (q-value = 0.00012) and  
429 e9.5\_2\_STRING (q-value = 4.17E-10) (Supplementary Table S6). The inflammatory process  
430 could be happening in the placenta during e7.5 to e9.5 when TB cells actively invade the decida  
431 [89] and create a pro-inflammatory environment [90]. Another possibility is contamination from  
432 decidual cells, which could be detected when combining bulk and scRNA-seq [91]. This further  
433 demonstrates the benefits of bulk and scRNA-seq data integration.

434 Upon conclusion of this study, we have shown that in the mouse placenta at e7.5, e8.5 and  
435 e9.5, genes with timepoint-specific expression patterns can be associated with distinct processes  
436 and cell types. The genes identified by timepoint-specific gene-network analysis could be

437 interesting candidates for future studies focused on the understanding of placental development  
 438 and placenta associated pregnancy disorders.  
 439

| Timepoint | Network       | Number of hub genes | Hub genes                                                                                                                                                                                                                                                                                                                                                                                                                                                                                                                                     |
|-----------|---------------|---------------------|-----------------------------------------------------------------------------------------------------------------------------------------------------------------------------------------------------------------------------------------------------------------------------------------------------------------------------------------------------------------------------------------------------------------------------------------------------------------------------------------------------------------------------------------------|
| e7.5      | e7.5_1_STRING | 7                   | <i>Mmp9</i> , <i>Cd68</i> , <i>Ctss</i> , <i>Cybb</i> , <i>Itgb2</i> , <i>Ptprc</i> , <i>Tlr2</i>                                                                                                                                                                                                                                                                                                                                                                                                                                             |
|           | e7.5_2_GENIE3 | 10                  | <i>Nr2f2</i> [39], <i>Prdm1</i> [40], <i>Ctbp2</i> [41], <i>Frk</i> , <i>Irf9</i> , <i>Irx1</i> , <i>Siah2</i> , <i>Trim8</i> , <i>Hmox1</i> , <i>Satb1</i>                                                                                                                                                                                                                                                                                                                                                                                   |
| e8.5      | e8.5_1_STRING | 11                  | <i>Akt1</i> [47], <i>Mapk1</i> [48], <i>Mapk14</i> [49], <i>Adam10</i> , <i>Creb1</i> , <i>Apob</i> , <i>Apoe</i> , <i>Casp3</i> , <i>Cdh2</i> , <i>Cttn</i> , <i>Hsp90aa1</i>                                                                                                                                                                                                                                                                                                                                                                |
|           | e8.5_2_GENIE3 | 17                  | <i>Erf</i> [92], <i>Setd2</i> [50], <i>Dnmt1</i> , <i>Dnmt3b</i> , <i>Lin28a</i> , <i>Vgll1</i> , <i>Msx2</i> , <i>Cenpf</i> , <i>Chek1</i> , <i>Dnajc2</i> , <i>Dvl3</i> , <i>Gppbp111</i> , <i>Jade1</i> , <i>Myef2</i> , <i>Nfxl1</i> , <i>Rbmx</i> , <i>Rhox4e</i>                                                                                                                                                                                                                                                                        |
| e9.5      | e9.5_1_STRING | 7                   | <i>Wnt5a</i> , <i>Fbxl19</i> , <i>Mgrn1</i> , <i>Nedd4</i> , <i>Smurf1</i> , <i>Ubc</i> , <i>Ube2d1</i>                                                                                                                                                                                                                                                                                                                                                                                                                                       |
|           | e9.5_1_GENIE3 | 34                  | <i>Esx1</i> [93], <i>Rb1</i> [60], <i>Yap1</i> [94], <i>Foxo3</i> , <i>Hif1an</i> , <i>Ncoa3</i> , <i>Peg3</i> , <i>2700081O15Rik</i> , <i>Ankrd2</i> , <i>Apbb1</i> , <i>Arid1b</i> , <i>Arrb1</i> , <i>Ash1l</i> , <i>Bbx</i> , <i>Calcoco1</i> , <i>Cavin1</i> , <i>Cdk5</i> , <i>Cenpb</i> , <i>Cited4</i> , <i>Creg1</i> , <i>Dtx1</i> , <i>Fam129b</i> , <i>Hcfc2</i> , <i>Hdac6</i> , <i>Mllt3</i> , <i>Mlxip</i> , <i>Phf8</i> , <i>Pitx1</i> , <i>Prmt2</i> , <i>Ski</i> , <i>Tsc22d1</i> , <i>Tulp1</i> , <i>Vgll4</i> , <i>Zfx</i> |
|           | e9.5_2_STRING | 15                  | <i>Cdh1</i> [95], <i>Egfr</i> [59], <i fn1<="" i=""> [61], <i>Igf2</i> [96], <i>Tgfb1</i> [72], <i>Vegfa</i> [97], <i>Col1a1</i>, <i>Igf1</i>, <i>Gas6</i>, <i>App</i>, <i>Csf1</i>, <i>Itpkb</i>, <i>Qsox1</i>, <i>Spp1</i>, <i>Timp1</i></i>                                                                                                                                                                                                                                                                                                |
|           | e9.5_2_GENIE3 | 27                  | <i>E2f8</i> [98], <i>Vegfa</i> [97], <i>Tead2</i> [99], <i>Ets1</i> , <i>Plagl1</i> , <i>Prnp</i> , <i>5730507C01Rik</i> , <i>Arhgef5</i> , <i>BC004004</i> , <i>Bhlhe40</i> , <i>Cbx7</i> , <i>Ctdsp1</i> , <i>Ell2</i> , <i>Fam83g</i> , <i>Grhl1</i> , <i>Klf3</i> , <i>Mrtfb</i> , <i>Orc2</i> , <i>Phf2</i> , <i>Pias1</i> , <i>Pias3</i> , <i>Rasd1</i> , <i>Rhox12</i> , <i>Sox18</i> , <i>Trip6</i> , <i>Txnip</i> , <i>Zfp362</i>                                                                                                    |

|  |               |    |                                                                                                                                                                                                                                                                  |
|--|---------------|----|------------------------------------------------------------------------------------------------------------------------------------------------------------------------------------------------------------------------------------------------------------------|
|  | e9.5_3_STRING | 5  | <i>Olr1, Cd59a, Gaa, Lpcat1, Stom</i>                                                                                                                                                                                                                            |
|  | e9.5_3_GENIE3 | 29 | <i>Tead1</i> [99], <i>Foxf1</i> [100], <i>Smad4</i> [101], <i>Smad5</i> [102], <i>Cebpb, Jun, Hes1, Mta3, Tead3, Cbx4, Cdk2, Dapk3, Dpf3, Elmsan1, Gata1, Hexim1, Hsbp1, Jade1, Lhx2, Limd1, Loxl2, Ncor2, Pcgf5, Rbm15b, Rhox4g, Rhox6, Rhox9, Sin3b, Tcf25</i> |
|  | e9.5_4_STRING | 10 | <i>Lpar3</i> [103], <i>Acta2, Gcgr, Adcy4, Gna12, Gnas, Pik3r3, Rhoc, Rhog, Rhoj</i>                                                                                                                                                                             |

440 Table 1: Hub genes associated with each network. Colored genes are ones that have annotated roles in  
 441 placental development (see Materials and Methods); green, e7.5-specific genes; blue, e8.5-specific genes;  
 442 brown, e9.5-specific genes.

443

## 444 **Materials and Methods**

### 445 **1. RNA-seq library preparation and sequencing**

446 Placenta tissue was collected from timed-pregnant CD-1 mice (Charles Rivers Labs) following the  
 447 guidelines and protocol approved by Iowa State University Institutional Animal Care and Use  
 448 Committee (IACUC), protocol number 18–350. Placenta samples were collected as previous  
 449 described [19], [104] at e7.5, e8.5, and e9.5 and the age of the embryo was determined by  
 450 following the embryonic development guidelines [105]. Briefly, tissues from the ectoplacental cone  
 451 (EPC) and chorion were separated from the decidua, yolk sac, umbilical cord, and embryo, and  
 452 then collected. For e7.5, 12 EPCs were collected and pooled into one replicate, as described in  
 453 [21]. For e8.5, five placentas were collected per replicate, and for e9.5, one placenta was  
 454 collected per replicate. Each timepoint had a total of 6 biological replicates.

455 Tissues were processed for RNA isolation immediately after collection using the Purelink RNA  
 456 micro scale kit (Thermofisher, 12183016). RNA concentration and RIN values were measured  
 457 using the RNA 6000 Nano assay kit on the Agilent 2100 Bioanalyzer (GTF facility, ISU), and all  
 458 samples had a RIN score  $\geq 7.7$  (Supplementary Table S12). Further processing of the samples,  
 459 library preparation and sequencing was performed by the DNA facility at Iowa State University.  
 460 Libraries were sequenced using the Illumina HiSeq 3000 with single-end 50 base pair reads. The  
 461 pooled library sample was run over two sequencing lanes (technical replicates for each sample).

### 462 **2. RNA-seq data processing**

463 The quality and adapter content were assessed using FastQC (version 0.11.7) [106]. Low quality  
464 reads and adapters were trimmed with Trimmomatic (version 0.39) [107].

465 Technical replicates were then merged, and the reads were pseudo-aligned and quantified (in  
466 TPM) using Kallisto (version 0.43.1;  $l = 200$ ,  $s = 30$ ;  $b = 100$ ) [108]. Transcript sequences on  
467 autosomal and sex chromosomes of the mouse genome (GRCm38.p6) from Ensembl release 98  
468 [109] were used to build the Kallisto index.

469 For further quality control, we carried out hierarchical clustering and principal component analysis  
470 (PCA) of samples. First, from the transcripts with raw counts  $\geq 20$  in  $\geq 6$  samples, we obtained the  
471 top 50% most variable transcripts, then centered and scaled their expression. Next, we  
472 implemented hierarchical clustering with the `hclust()` function in R (package *stats* [110], version  
473 3.6.3), using the agglomerative approach with Euclidean distance and complete linkage. To  
474 implement PCA, we used the `prcomp()` function in R (package *stats*, version 3.6.3). We observed  
475 samples of each timepoint cluster close to each other and away from other timepoints. Outlier  
476 samples, which did not cluster with their respective timepoint groups, were removed prior to  
477 carrying out downstream analyses (Supplementary Figure S6).

### 478 **3. Cluster analysis**

479 Before performing all clustering procedures, transcripts with low raw counts (mean raw counts  $<$   
480 20 in all timepoints) were filtered out, and expression data (in TPM) was scaled and re-centered.  
481 Hierarchical clustering, k-means clustering, self-organizing map and spectral clustering was  
482 performed on the top 75% most variable protein coding transcripts (23,571 transcripts total).

483 To do hierarchical clustering, we implemented hierarchical clustering with the `hclust()` function in  
484 R (package *stats* [110], version 3.6.3), using the agglomerative approach with Euclidean distance  
485 and complete linkage. The resulting dendrogram was cut at the second highest level to obtain  
486 three clusters.

487 K-means clustering was carried out using the R function `kmeans()` (*centers* = 3, other parameters:  
488 default; package *stats*, version 3.6.3).

489 Self-organizing map clustering was performed with the R function `som()` with rectangular  $3 \times 1$   
490 grid (other parameters: default; package *kohonen* [111], version 3.0.10).

491 To implement spectral clustering, we utilized the following functions in R:  
492 `computeGaussianSimilarity()` (*sigma* = 1) to compute similarity matrix, and `spectralClustering()` (*K*  
493 = 3, other parameters: default; package *RclusTool* [112], version 0.91.3) to cluster.

494 To determine how the genes in each cluster relate to specific processes of placental  
495 development, we obtained gene lists from previously published review articles [5], [15]–[18], then

496 calculate the percentage of markers in hierarchical clusters as (number of markers in a  
497 cluster)/(total number of markers of the process) × 100.

#### 498 **4. Differential expression analysis (DEA)**

499 DEA at transcript and gene levels were carried out with Sleuth (version 0.30.0) [113] using the  
500 likelihood ratio test (default basic filtering) and the p-value aggregation process [114]. Fold  
501 change of a transcript was calculated using its average raw TPM across all samples. A transcript  
502 was considered differentially expressed (DE) if it had a fold change ≥ 1.5 and a q-value ≤ 0.05. A  
503 gene was considered DE if its q-value was ≤ 0.05 and had at least one protein-coding DE  
504 transcript. For lists of DE protein-coding transcripts that had at least one DE gene, and lists of DE  
505 genes with at least one DE protein-coding transcripts, see Supplementary Table S3.

#### 506 **5. Definition of timepoint-specific genes**

507 Timepoint-specific gene groups are defined as the following:

- 508 i. E8.5-specific transcripts: transcripts in e8.5 hierarchical cluster, are up-regulated at e8.5  
509 (compared to e7.5) or are up-regulated at e8.5 (compared to e9.5). E8.5-specific genes are ones  
510 associated with e8.5-specific transcripts.
- 511 ii. E7.5-specific transcripts: transcripts in e7.5 hierarchical cluster, are up-regulated at e7.5  
512 (compared to e9.5), and are not in e8.5-specific group. E7.5-specific genes are ones associated  
513 with e7.5-specific transcripts.
- 514 iii. E9.5-specific transcripts: transcripts in e9.5 hierarchical cluster, are up-regulated at e9.5  
515 (compared to e7.5), and are not in e8.5-specific group. E9.5-specific genes are ones associated  
516 with e9.5-specific transcripts.

#### 517 **6. Network construction and analysis**

518 The STRING database (version 11.0b) [35] was used to build protein – protein interaction  
519 networks at each timepoint. Edges from evidence channels: experiments, databases, text-mining  
520 and co-expression with confidence score ≥ 0.55 were chosen for further analyses.

521 Gene regulatory networks at each timepoint were constructed with GENIE3 (version 1.16.0) [36].  
522 At each timepoint, as inputs for GENIE3, timepoint-specific transcripts with average TPM at the  
523 timepoint ≥ 5 were aggregated to obtain gene counts with the R package tximport (version 1.14.2;  
524 *countsFromAbundance* = lengthScaledTPM) [115]. Genes that encode transcription factors (TFs)  
525 and co-TFs, downloaded from AnimalTFDB (version 3.0) [116], were treated as candidate  
526 regulators. Then, edges with weight < the 90<sup>th</sup> percentile were filtered out.

527 Largest connected components of the networks were analyzed using Cytoscape (version 3.7.2)  
528 [117]. All networks were treated as undirected, and network sub-clustering was performed using



529 the GLayer plug-in (default parameters) [37]. Networks with  $\geq 100$  nodes were used for further  
530 analyses. Hub genes were defined as nodes that have degree, betweenness and closeness  
531 centralities in the 10<sup>th</sup> percentile of their networks.

532 To determine the relevant functions of the genes in networks, we used gene ontology (GO)  
533 analysis. ClusterProfiler (version 4.0.5) [118] was used, with the mouse annotation from the  
534 org.Mm.eg.db R package (version 3.13.0) [119], the maximum size of genes = 1000, and a q-  
535 value cut-off = 0.05. Next, a fold change for each term was calculated as GeneRatio/BgRatio. A  
536 GO term was considered enriched when its q-value  $\leq 0.05$ , fold change  $\geq 2$ , and the number of  
537 observed genes  $\geq 5$ .

538 A gene was determined to have an annotated role in placental development if it was annotated  
539 with experimental evidence or had an associated PubMed ID under all GO and MGI Phenotype  
540 terms related to placenta, TB cells, TE and chorion layer. Experimental evidence codes include  
541 “Inferred from Experiment” (EXP), “Inferred from Direct Assay” (IDA), “Inferred from Physical  
542 Interaction” (IPI), “Inferred from Mutant Phenotype” (IMP), “Inferred from Genetic Interaction”  
543 (IGI), and “Inferred from Expression Pattern” (IEP). GO terms, MGI Phenotype terms and gene  
544 annotations were downloaded from MGI (<http://www.informatics.jax.org/>) (version 6.19) [38]. For  
545 lists of terms used, see Supplementary Table S7.

## 546 **7. Deconvolution analysis**

547 To infer the proportion of cell types across timepoints, we carried out deconvolution analysis using  
548 the R package LinSeed (version 0.99.2) [68]. Gene abundances (in TPM) used as inputs for the  
549 analysis were obtained using tximport (version 1.14.2; *countsFromAbundance* =  
550 *lengthScaledTPM*) [115]. Then, we used top 5000 most expressed genes across timepoints, and  
551 sampled 100000 times to test for the significance of the genes to be used for deconvolution  
552 analysis. A significant gene was one with p-value  $\leq 0.05$ . The number of cell groups was  
553 determined after examining the singular value decomposition (SVD) plot, generated with the  
554 *svdPlot()* function in LinSeed. Cell markers were defined as the top 100 genes closest to the cell  
555 group’s corner, and closer to the corner than any other corners.

## 556 **8. Placenta Cell Enrichment and Placenta Ontology analysis**

557 The PlacentaCellEnrich webtool [69] and Placenta Ontology [71] were used to infer the relevant  
558 cell types using gene lists. For PlacentaCellEnrich, cell-type specific groups were based on the  
559 single-cell transcriptome data of human maternal-fetal interface from Vento-Tormo et al. [26]. A  
560 enrichment was considered significant if its adj. p-value is  $\leq 0.05$ , fold change  $\geq 2$ , and the  
561 number of associated genes found is  $\geq 5$ . For Placenta Ontology, we obtained placenta ontology  
562 GMT file from Naismith et al. and uploaded the file to the WEB-based GENE SeT ANALYSIS Toolkit

563 ([www.webgestalt.org](http://www.webgestalt.org)) [120] as a functional database. An ontology with FDR  $\leq 0.05$ , fold change  $\geq$   
564 2 and the number of observed genes  $\geq 5$  was considered enriched.

## 565 9. *In vitro* validation experiments

566 **Cell culture** – HTR-8/SVneo (ATCC CRL3271) were cultured as recommended by ATCC and as  
567 done by others [121]. Briefly, cells were grown in RPMI-1640 media (ATCC 302001)  
568 supplemented with 5% FBS (VWR, 97068-085) without antibiotics. Cells were split every 3 to 4  
569 days, at 80-90% confluency.

570 **siRNA knockdown** – HTR-8/SVneo cells were transfected with two different siRNA for each  
571 target gene knockdown (KD). Cells were split at 80% confluency, and siRNA transfection was  
572 performed in 6-well plates; 150,000 cells/well were seeded [20]. After 24 hours, cells were  
573 transfected with 30nM siRNA using RNAiMax 3000 (ThermoFisher, 13778150). Media was  
574 replaced after 24 hours of transfection, and cells were collected after 48 hours of transfection and  
575 seeded for migration assays. *GAPDH* was used for normalization of all four genes' expression  
576 ( $\Delta\text{CT}$ ). Percent KD were calculated with the  $\Delta\Delta\text{CT}$  method. SiRNA and primer information can be  
577 found in Supplementary Table S12.

578 **Migration assays** – Migration assays were performed using Costar inserts (Corning, 3464). The  
579 inserts were placed in a 24 well plate and 75,000 cells in serum-free RPMI media (ATCC, 30-  
580 2001) were directly seeded in the top chamber of the insert. The bottom chamber was filled with  
581 600ul of RPMI media supplemented with 10% FBS as a chemoattractant. The cells were allowed  
582 to migrate for 24 hours at 37°C. The cells on the bottom of the inserts were fixed in 4% PFA  
583 (Fisher Scientific, AAJ61899AK) for 5 min and then washed for 1 min with PBS twice. The cells in  
584 the top chamber were scraped off using a wet q-tip (Fisher Scientific, 22029488) and the cells on  
585 the bottom of the inserts were stained with Hematoxylin (Fisher Scientific, 23245677) for 24  
586 hours. The inserts were washed twice in distilled water. The membrane was cut using a scalpel  
587 (Fisher Scientific, 1484002) and mounted on a clean glass slide in Vectamount mounting medium  
588 (Fisher Scientific, NC9354983). The cells were observed under a dissection microscope and  
589 imaged at 12.5X magnification. The images were analyzed using the ImageJ tool, and the  
590 integrated density was obtained for each image.

591 **Statistical analysis** – Experiments were performed with three replicates per condition (negative  
592 control or knockdown) per gene. P-values were calculated with Wilcoxon rank sum test.

593

594 **Data Availability Statement**

595 All code for the analyses is available at <https://github.com/Tuteja-Lab/PlacentaRNA-seq>. All raw  
596 and processed data is available for download on NCBI Gene Expression Omnibus (GEO)  
597 Repository, accession number: GSE202243.

598

### 599 **Acknowledgements**

600 We acknowledge the Iowa State University DNA Facility for preparing the library and providing  
601 sequencing for RNA-seq experiments, and the Research IT group at Iowa State University  
602 (<http://researchit.las.iastate.edu>) for providing servers and IT support. We would like to thank Tuteja  
603 lab members for their discussion and support.

604

### 605 **Author contributions**

606 Conceptualization, H.V., G.T.; Methodology, H.V., G.T.; Data Generation, H.K., R.S., Formal  
607 Analysis, H.V.; Data Interpretation, H.V., G.T.; Experimental Validation, H.K.; Analysis Validation,  
608 K.K.; Writing – Original Draft Preparation, H.V., G.T.; Writing – Review and Editing, H.V., H.K.,  
609 K.K., R.S. and G.T.; Supervision, G.T.; Funding Acquisition, G.T.

610

### 611 **Declaration of Interests**

612 The authors declare no competing interests.

613

### 614 **Abbreviations**

|         |                          |
|---------|--------------------------|
| e       | Embryonic day            |
| RNA-seq | RNA sequencing           |
| TB      | Trophoblast              |
| TE      | Trophectoderm            |
| EPC     | Ectoplacental cone       |
| TGC     | Trophoblast giant cells  |
| GO      | Gene ontology            |
| MGI     | Mouse Genome Informatics |
| TPM     | Transcripts per million  |
| EVT     | Extravillous trophoblast |
| SCT     | Syncytiotrophoblast      |
| VCT     | Villous trophoblast      |

|              |                                                                  |
|--------------|------------------------------------------------------------------|
| adj. p-value | Adjusted p-value                                                 |
| FDR          | False discovery rate                                             |
| sc           | Single-cell                                                      |
| DEA          | Differential expression analysis                                 |
| DE           | Differentially expressed                                         |
| FPKM         | Fragments per kilobase of transcript per million of mapped reads |

615

616

## References

- 617 [1] J. E. A. K. Bamfo and A. O. Odibo, "Diagnosis and management of fetal growth restriction.," *J.*  
618 *Pregnancy*, vol. 2011, p. 640715, 2011.
- 619 [2] S. Rana, E. Lemoine, J. Granger, and S. A. Karumanchi, "Preeclampsia: Pathophysiology,  
620 Challenges, and Perspectives," *Circ. Res.*, vol. 124, no. 7, pp. 1094–1112, 2019.
- 621 [3] M. Hemberger, C. W. Hanna, and W. Dean, "Mechanisms of early placental development in  
622 mouse and humans," *Nat. Rev. Genet.*, vol. 21, no. 1, pp. 27–43, 2020.
- 623 [4] F. Soncin, D. Natale, and M. M. Parast, "Signaling pathways in mouse and human trophoblast  
624 differentiation: A comparative review," *Cell. Mol. Life Sci.*, vol. 72, no. 7, pp. 1291–1302, 2015.
- 625 [5] E. D. Watson and J. C. Cross, "Development of structures and transport functions in the mouse  
626 placenta," *Physiology*, vol. 20, no. 3, pp. 180–193, 2005.
- 627 [6] F. Guillemot, A. Nagy, A. Auerbach, J. Rossant, and A. L. Joyner, "Essential role of Mash-2 in  
628 extraembryonic development," *Nat. 1994 3716495*, vol. 371, no. 6495, pp. 333–336, 1994.
- 629 [7] K. M. Varberg *et al.*, "ASCL2 reciprocally controls key trophoblast lineage decisions during  
630 hemochorial placenta development," *Proc. Natl. Acad. Sci. U. S. A.*, vol. 118, no. 10, Mar. 2021.
- 631 [8] P. Kuckenberger, C. Kubaczka, and H. Schorle, "The role of transcription factor Tcfap2c/TFAP2C  
632 in trophoctoderm development," *Reprod. Biomed. Online*, vol. 25, no. 1, pp. 12–20, Jul. 2012.
- 633 [9] F. Soncin, D. Natale, and M. M. Parast, "Signaling pathways in mouse and human trophoblast  
634 differentiation: A comparative review," *Cellular and Molecular Life Sciences*, vol. 72, no. 7.  
635 Birkhauser Verlag AG, pp. 1291–1302, 18-Mar-2015.
- 636 [10] E. Bevilacqua, A. R. Lorenzon, C. L. Bandeira, and M. S. Hoshida, *Biology of the Ectoplacental*  
637 *Cone*, no. clone 4311. Elsevier, 2014.
- 638 [11] J. C. Cross, D. G. Simmons, and E. D. Watson, "Chorioallantoic Morphogenesis and Formation  
639 of the Placental Villous Tree," *Ann. New York Acad. Sci.*, vol. 995, pp. 84–93, 2003.
- 640 [12] J. C. Cross, H. Nakano, D. R. C. Natale, D. G. Simmons, and E. D. Watson, "Branching

- 641 morphogenesis during development of placental villi,” *Differentiation*, vol. 74, no. 7, pp. 393–401,  
642 2006.
- 643 [13] K. Walentin, C. Hinze, and K. M. Schmidt-Ott, “The basal chorionic trophoblast cell layer: An  
644 emerging coordinator of placenta development,” *BioEssays*, vol. 38, no. 3, pp. 254–265, 2016.
- 645 [14] D. G. Simmons, *Postimplantation Development of the Chorioallantoic Placenta*. Elsevier, 2014.
- 646 [15] J. C. Cross, “How to Make a Placenta: Mechanisms of Trophoblast Cell Differentiation in Mice –  
647 A Review,” vol. 26, 2005.
- 648 [16] M. Hemberger and J. C. Cross, “Genes governing placental development,” vol. 12, no. 4, pp.  
649 162–168, 2001.
- 650 [17] D. Hu and J. C. Cross, “Development and function of trophoblast giant cells in the rodent  
651 placenta,” *Int. J. Dev. Biol.*, vol. 54, no. 2–3, pp. 341–354, 2010.
- 652 [18] J. Rossant, J. C. Cross, and S. Lunenfeld, “Placental Development: Lessons from Mouse  
653 Mutants,” vol. 2, no. July, pp. 538–548, 2001.
- 654 [19] G. Tuteja, T. Chung, and G. Bejerano, “Changes in the enhancer landscape during early  
655 placental development uncover a trophoblast invasion gene-enhancer network,” *Placenta*, vol.  
656 37, pp. 45–55, 2016.
- 657 [20] R. R. Starks, R. A. Alhasan, H. Kaur, K. A. Pennington, L. C. Schulz, and G. Tuteja,  
658 “Transcription Factor PLAGL1 Is Associated with Angiogenic Gene Expression in the Placenta,”  
659 *Int. J. Mol. Sci. 2020, Vol. 21, Page 8317*, vol. 21, no. 21, p. 8317, Nov. 2020.
- 660 [21] R. R. Starks, A. Biswas, A. Jain, and G. Tuteja, “Combined analysis of dissimilar promoter  
661 accessibility and gene expression profiles identifies tissue-specific genes and actively repressed  
662 networks,” *Epigenetics and Chromatin*, vol. 12, no. 1, pp. 1–16, 2019.
- 663 [22] M. Abdulghani, G. Song, H. Kaur, J. W. Walley, and G. Tuteja, “Comparative Analysis of the  
664 Transcriptome and Proteome during Mouse Placental Development,” *J. Proteome Res.*, vol. 18,  
665 no. 5, pp. 2088–2099, May 2019.
- 666 [23] R. Morey *et al.*, “Transcriptomic Drivers of Differentiation, Maturation, and Polyploidy in Human  
667 Extravillous Trophoblast,” *Front. Cell Dev. Biol.*, vol. 9, p. 2269, Sep. 2021.
- 668 [24] M. Prater *et al.*, “RNA-Seq reveals changes in human placental metabolism, transport and  
669 endocrinology across the first–second trimester transition,” *Biol. Open*, vol. 10, no. 6, Jun. 2021.
- 670 [25] B. Marsh and R. Blelloch, “Single nuclei RNA-seq of mouse placental labyrinth development,”  
671 *Elife*, vol. 9, pp. 1–27, Oct. 2020.
- 672 [26] R. Vento-Tormo *et al.*, “Single-cell reconstruction of the early maternal – fetal interface in

- 673 humans,” 2018.
- 674 [27] M. Tanaka, M. Gertsenstein, J. Rossant, and A. Nagy, “Mash2 Acts Cell Autonomously in Mouse  
675 Spongiotrophoblast Development,” *Dev. Biol.*, vol. 190, no. 1, pp. 55–65, Oct. 1997.
- 676 [28] M. Kibschull, K. Colaco, E. Matysiak-Zablocki, E. Winterhager, and S. J. Lye, “Connexin31.1  
677 (Gjb5) deficiency blocks trophoblast stem cell differentiation and delays placental development,”  
678 *Stem Cells Dev.*, vol. 23, no. 21, pp. 2649–2660, Nov. 2014.
- 679 [29] M. T. Tetzlaff *et al.*, “Cyclin F Disruption Compromises Placental Development and Affects  
680 Normal Cell Cycle Execution,” *Mol. Cell. Biol.*, vol. 24, no. 6, pp. 2487–2498, Mar. 2004.
- 681 [30] J. T. Yang, H. Rayburn, and R. O. Hynes, “Cell adhesion events mediated by alpha 4 integrins  
682 are essential in placental and cardiac development,” *Development*, vol. 121, no. 2, pp. 549–560,  
683 Feb. 1995.
- 684 [31] H. D. Gabriel *et al.*, “Transplacental uptake of glucose is decreased in embryonic lethal  
685 connexin26-deficient mice,” *J. Cell Biol.*, vol. 140, no. 6, pp. 1453–1461, Mar. 1998.
- 686 [32] A. N. Sferruzzi-Perri *et al.*, “Placental-Specific Igf2 Deficiency Alters Developmental Adaptations  
687 to Undernutrition in Mice,” *Endocrinology*, vol. 152, no. 8, pp. 3202–3212, Aug. 2011.
- 688 [33] D. Jiang, C. Tang, and A. Zhang, “Cluster analysis for gene expression data: A survey,” *IEEE  
689 Trans. Knowl. Data Eng.*, vol. 16, no. 11, pp. 1370–1386, Nov. 2004.
- 690 [34] M. Kibschull, K. Colaco, E. Matysiak-Zablocki, E. Winterhager, and S. J. Lye, “Connexin31.1  
691 (Gjb5) deficiency blocks trophoblast stem cell differentiation and delays placental development,”  
692 *Stem Cells Dev.*, vol. 23, no. 21, pp. 2649–2660, Nov. 2014.
- 693 [35] D. Szklarczyk *et al.*, “STRING v11: Protein-protein association networks with increased  
694 coverage, supporting functional discovery in genome-wide experimental datasets,” *Nucleic Acids  
695 Res.*, vol. 47, no. D1, pp. D607–D613, Jan. 2019.
- 696 [36] V. A. Huynh-Thu, A. Irrthum, L. Wehenkel, and P. Geurts, “Inferring regulatory networks from  
697 expression data using tree-based methods,” *PLoS One*, vol. 5, no. 9, 2010.
- 698 [37] G. Su, A. Kuchinsky, J. H. Morris, D. J. States, and F. Meng, “GLay: community structure  
699 analysis of biological networks,” *Bioinformatics*, vol. 26, no. 24, pp. 3135–3137, Dec. 2010.
- 700 [38] C. L. Smith and J. T. Eppig, “The mammalian phenotype ontology: enabling robust annotation  
701 and comparative analysis,” *Wiley Interdiscip. Rev. Syst. Biol. Med.*, vol. 1, no. 3, pp. 390–399,  
702 Nov. 2009.
- 703 [39] M. A. Hubert, S. L. Sherritt, C. J. Bachurski, and S. Handwerger, “Involvement of Transcription  
704 Factor NR2F2 in Human Trophoblast Differentiation,” *PLoS One*, vol. 5, no. 2, p. e9417, Feb.



- 705 2010.
- 706 [40] A. Mould, M. A. J. Morgan, L. Li, E. K. Bikoff, and E. J. Robertson, “Blimp1/Prdm1 governs  
707 terminal differentiation of endovascular trophoblast giant cells and defines multipotent  
708 progenitors in the developing placenta,” *Genes Dev.*, vol. 26, no. 18, pp. 2063–2074, Sep. 2012.
- 709 [41] J. D. Hildebrand and P. Soriano, “Overlapping and Unique Roles for C-Terminal Binding Protein  
710 1 (CtBP1) and CtBP2 during Mouse Development,” *Mol. Cell. Biol.*, vol. 22, no. 15, p. 5296,  
711 Aug. 2002.
- 712 [42] V. Plaks *et al.*, “Matrix metalloproteinase-9 deficiency phenocopies features of preeclampsia and  
713 intrauterine growth restriction,” *Proc. Natl. Acad. Sci. U. S. A.*, vol. 110, no. 27, p. 11109, Jul.  
714 2013.
- 715 [43] M. L. Zenclussen *et al.*, “Heme oxygenase-1 is critically involved in placentation, spiral artery  
716 remodeling, and blood pressure regulation during murine pregnancy,” *Front. Pharmacol.*, vol. 5,  
717 no. JAN, 2014.
- 718 [44] H. Rao *et al.*, “SATB1 downregulation induced by oxidative stress participates in trophoblast  
719 invasion by regulating  $\beta$ -catenin,” *Biol. Reprod.*, vol. 98, no. 6, pp. 810–820, Jun. 2018.
- 720 [45] Q. Shi *et al.*, “FRK inhibits migration and invasion of human glioma cells by promoting N-  
721 cadherin/ $\beta$ -catenin complex formation,” *J. Mol. Neurosci.*, vol. 55, no. 1, pp. 32–41, Jan. 2015.
- 722 [46] Y. Yamada *et al.*, “TRIM44 promotes cell proliferation and migration by inhibiting FRK in renal  
723 cell carcinoma,” *Cancer Sci.*, vol. 111, no. 3, pp. 881–890, Mar. 2020.
- 724 [47] Z. Yang *et al.*, “Protein kinase B alpha/Akt1 regulates placental development and fetal growth,” *J.*  
725 *Biol. Chem.*, vol. 278, no. 34, pp. 32124–32131, Aug. 2003.
- 726 [48] N. Hatano *et al.*, “Essential role for ERK2 mitogen-activated protein kinase in placental  
727 development,” *Genes to Cells*, vol. 8, no. 11, pp. 847–856, Nov. 2003.
- 728 [49] R. H. Adams *et al.*, “Essential Role of p38 $\alpha$  MAP Kinase in Placental but Not Embryonic  
729 Cardiovascular Development,” *Mol. Cell*, vol. 6, no. 1, pp. 109–116, Jul. 2000.
- 730 [50] M. Hu *et al.*, “Histone H3 lysine 36 methyltransferase Hypb/Setd2 is required for embryonic  
731 vascular remodeling,” *Proc. Natl. Acad. Sci. U. S. A.*, vol. 107, no. 7, pp. 2956–2961, Feb. 2010.
- 732 [51] T. Hu, G. Wang, Z. Zhu, Y. Huang, H. Gu, and X. Ni, “Increased ADAM10 expression in  
733 preeclamptic placentas is associated with decreased expression of hydrogen sulfide production  
734 enzymes,” *Placenta*, vol. 36, no. 8, pp. 947–950, Aug. 2015.
- 735 [52] D. Vaiman, R. Calicchio, and F. Miralles, “Landscape of Transcriptional Deregulations in the  
736 Preeclamptic Placenta,” *PLoS One*, vol. 8, no. 6, p. 65498, Jun. 2013.

- 737 [53] A. Mukhopadhyay *et al.*, “Placental expression of DNA methyltransferase 1 (DNMT1): Gender-  
738 specific relation with human placental growth,” *Placenta*, vol. 48, pp. 119–125, Dec. 2016.
- 739 [54] M. R. Branco *et al.*, “Maternal DNA Methylation Regulates Early Trophoblast Development,” *Dev.*  
740 *Cell*, vol. 36, no. 2, p. 152, Jan. 2016.
- 741 [55] J. L. Seabrook *et al.*, “Role of LIN28A in Mouse and Human Trophoblast Cell Differentiation,”  
742 *Biol. Reprod.*, vol. 89, no. 4, p. 95, 2013.
- 743 [56] F. Soncin *et al.*, “Comparative analysis of mouse and human placentae across gestation reveals  
744 species-specific regulators of placental development,” *Dev.*, vol. 145, no. 2, 2018.
- 745 [57] H. Liang *et al.*, “MSX2 Induces Trophoblast Invasion in Human Placenta,” *PLoS One*, vol. 11, no.  
746 4, p. e0153656, Apr. 2016.
- 747 [58] E. Tzouanacou, S. Tweedie, and V. Wilson, “Identification of Jade1, a Gene Encoding a PHD  
748 Zinc Finger Protein, in a Gene Trap Mutagenesis Screen for Genes Involved in Anteroposterior  
749 Axis Development,” *Mol. Cell. Biol.*, vol. 23, no. 23, pp. 8553–8562, 2003.
- 750 [59] T. C. Lee and D. W. Threadgill, “Generation and validation of mice carrying a conditional allele of  
751 the epidermal growth factor receptor,” *Genesis*, vol. 47, no. 2, pp. 85–92, 2009.
- 752 [60] H. Sun *et al.*, “An E2F Binding-Deficient Rb1 Protein Partially Rescues Developmental Defects  
753 Associated with Rb1 Nullizygoty,” *Mol. Cell. Biol.*, vol. 26, no. 4, p. 1527, Feb. 2006.
- 754 [61] E. L. George, E. N. Georges-Labouesse, R. S. Patel-King, H. Rayburn, and R. O. Hynes,  
755 “Defects in mesoderm, neural tube and vascular development in mouse embryos lacking  
756 fibronectin,” *Development*, vol. 119, no. 4, pp. 1079–1091, Dec. 1993.
- 757 [62] H. Li *et al.*, “Trophoblast-Specific Reduction of VEGFA Alters Placental Gene Expression and  
758 Maternal Cardiovascular Function in Mice,” *Biol. Reprod.*, vol. 91, no. 4, pp. 1–12, Oct. 2014.
- 759 [63] G. Meinhardt *et al.*, “Wingless ligand 5a is a critical regulator of placental growth and survival,”  
760 *Sci. Reports 2016 61*, vol. 6, no. 1, pp. 1–14, Jun. 2016.
- 761 [64] C. A. Kessler, J. W. Stanek, K. F. Stringer, and S. Handwerger, “ETS1 induces human  
762 trophoblast differentiation,” *Endocrinol. (United States)*, vol. 156, no. 5, pp. 1851–1859, May  
763 2015.
- 764 [65] B. Zhuang *et al.*, “Oxidative stress-induced C/EBP $\beta$  inhibits  $\beta$ -catenin signaling molecule  
765 involving in the pathology of preeclampsia,” *Placenta*, vol. 36, no. 8, pp. 839–846, Aug. 2015.
- 766 [66] H. Song *et al.*, “LHX2 promotes malignancy and inhibits autophagy via mTOR in osteosarcoma  
767 and is negatively regulated by miR-129-5p,” *Aging (Albany NY)*, vol. 11, no. 21, p. 9794, 2019.
- 768 [67] S. Lager and T. L. Powell, “Regulation of Nutrient Transport across the Placenta,” *J. Pregnancy*,

- 769 vol. 2012, p. 14, 2012.
- 770 [68] K. Zaitsev, M. Bambouskova, A. Swain, and M. N. Artyomov, "Complete deconvolution of cellular  
771 mixtures based on linearity of transcriptional signatures," *Nat. Commun.* 2019 101, vol. 10, no. 1,  
772 pp. 1–16, May 2019.
- 773 [69] A. Jain and G. Tuteja, "PlacentaCellEnrich: A tool to characterize gene sets using placenta cell-  
774 specific gene enrichment analysis," *Placenta*, vol. 103, pp. 164–171, Jan. 2021.
- 775 [70] R. Vento-Tormo *et al.*, "Single-cell reconstruction of the early maternal–fetal interface in  
776 humans," *Nature*, vol. 563, no. 7731, pp. 347–353, Nov. 2018.
- 777 [71] K. Naismith and B. Cox, "Human placental gene sets improve analysis of placental pathologies  
778 and link trophoblast and cancer invasion genes," *Placenta*, vol. 112, pp. 9–15, Sep. 2021.
- 779 [72] C. H. Graham *et al.*, "Establishment and Characterization of First Trimester Human Trophoblast  
780 Cells with Extended Lifespan," *Exp. Cell Res.*, vol. 206, no. 2, pp. 204–211, Jun. 1993.
- 781 [73] M. Wang *et al.*, "Galectin-14 Promotes Trophoblast Migration and Invasion by Upregulating the  
782 Expression of MMP-9 and N-Cadherin," *Front. Cell Dev. Biol.*, vol. 9, p. 487, Mar. 2021.
- 783 [74] A. L. Hirschberg, I. Jakson, C. Graells Brugalla, D. Salamon, and D. Ujvari, "Interaction between  
784 insulin and androgen signalling in decidualization, cell migration and trophoblast invasion in  
785 vitro," *J. Cell. Mol. Med.*, vol. 25, no. 20, pp. 9523–9532, Oct. 2021.
- 786 [75] H. Okae *et al.*, "Derivation of Human Trophoblast Stem Cells," *Cell Stem Cell*, vol. 22, no. 1, pp.  
787 50-63.e6, Jan. 2018.
- 788 [76] M. Constância *et al.*, "Placental-specific IGF-II is a major modulator of placental and fetal  
789 growth," *Nat.* 2002 4176892, vol. 417, no. 6892, pp. 945–948, Jun. 2002.
- 790 [77] N. Alfaidy *et al.*, "Placental Transcription Profiling in 6–23 Weeks' Gestation Reveals Differential  
791 Transcript Usage in Early Development," *Int. J. Mol. Sci.* 2022, Vol. 23, Page 4506, vol. 23, no.  
792 9, p. 4506, Apr. 2022.
- 793 [78] L. Das *et al.*, "ETS2 and Twist1 promote invasiveness of Helicobacter pylori-infected gastric  
794 cancer cells by inducing Siah2," *Biochem. J.*, vol. 473, no. 11, p. 1629, Jun. 2016.
- 795 [79] C. Yang *et al.*, "Down-regulated miR-26a promotes proliferation, migration, and invasion via  
796 negative regulation of MTDH in esophageal squamous cell carcinoma," *FASEB J.*, vol. 31, no. 5,  
797 pp. 2114–2122, May 2017.
- 798 [80] W. zhao Peng, J. xi Liu, C. feng Li, R. Ma, and J. zheng Jie, "Hnrnpk promotes gastric  
799 tumorigenesis through regulating cd44e alternative splicing," *Cancer Cell Int.*, vol. 19, no. 1, pp.  
800 1–11, Dec. 2019.

- 801 [81] H. Alam *et al.*, “HP1 $\gamma$  Promotes Lung Adenocarcinoma by Downregulating the Transcription-  
802 Repressive Regulators NCOR2 and ZBTB7A,” *Cancer Res.*, vol. 78, no. 14, pp. 3834–3848, Jul.  
803 2018.
- 804 [82] V. Costanzo, A. Bardelli, S. Siena, and S. Abrignani, “Exploring the links between cancer and  
805 placenta development,” *Open Biol.*, vol. 8, no. 6, Jun. 2018.
- 806 [83] R. B. Donker *et al.*, “The expression profile of C19MC microRNAs in primary human trophoblast  
807 cells and exosomes,” *Mol. Hum. Reprod.*, vol. 18, no. 8, pp. 417–424, Aug. 2012.
- 808 [84] J. Xie, Y. Xu, L. Wan, P. Wang, M. Wang, and M. Dong, “Involvement of follistatin-like 3 in  
809 preeclampsia,” *Biochem. Biophys. Res. Commun.*, vol. 506, no. 3, pp. 692–697, Nov. 2018.
- 810 [85] X. Zhang, K. E. Green, C. Yallampalli, and Y. L. Dong, “Adrenomedullin Enhances Invasion by  
811 Trophoblast Cell Lines,” *Biol. Reprod.*, vol. 73, no. 4, pp. 619–626, Oct. 2005.
- 812 [86] G. Chen, B. Ning, and T. Shi, “Single-cell RNA-seq technologies and related computational data  
813 analysis,” *Front. Genet.*, vol. 10, no. APR, p. 317, 2019.
- 814 [87] J. Wang *et al.*, “Gene expression distribution deconvolution in single-cell RNA sequencing,”  
815 *Proc. Natl. Acad. Sci. U. S. A.*, vol. 115, no. 28, pp. E6437–E6446, Jul. 2018.
- 816 [88] T. S. Andrews and M. Hemberg, “Identifying cell populations with scRNASeq,” *Mol. Aspects*  
817 *Med.*, vol. 59, pp. 114–122, Feb. 2018.
- 818 [89] L. Woods, V. Perez-garcia, and M. Hemberger, “Regulation of Placental Development and Its  
819 Impact on Fetal Growth — New Insights From Mouse Models,” vol. 9, no. September, pp. 1–18,  
820 2018.
- 821 [90] G. Mor, I. Cardenas, V. Abrahams, and S. Guller, “Inflammation and pregnancy: the role of the  
822 immune system at the implantation site,” *Ann. N. Y. Acad. Sci.*, vol. 1221, no. 1, p. 80, 2011.
- 823 [91] H. Suryawanshi *et al.*, “Dynamic genome-wide gene expression and immune cell composition in  
824 the developing human placenta,” *J. Reprod. Immunol.*, vol. 151, p. 103624, Jun. 2022.
- 825 [92] C. Papadaki *et al.*, “Transcriptional repressor erf determines extraembryonic ectoderm  
826 differentiation,” *Mol. Cell. Biol.*, vol. 27, no. 14, pp. 5201–5213, Jul. 2007.
- 827 [93] Y. Li and R. R. Behringer, “Esx1 is an X-chromosome-imprinted regulator of placental  
828 development and fetal growth,” *Nat. Genet.* 1998 203, vol. 20, no. 3, pp. 309–311, 1998.
- 829 [94] G. Meinhardt *et al.*, “Pivotal role of the transcriptional co-activator YAP in trophoblast stemness  
830 of the developing human placenta,” *Proc. Natl. Acad. Sci. U. S. A.*, vol. 117, no. 24, pp. 13562–  
831 13570, Jun. 2020.
- 832 [95] M. P. Stemmler and I. Bedzhov, “A Cdh1HA knock-in allele rescues the Cdh1 $^{-/-}$  phenotype but

- 833 shows essential Cdh1 function during placentation," *Dev. Dyn.*, vol. 239, no. 9, pp. 2330–2344,  
834 Sep. 2010.
- 835 [96] A. L. Fowden, "The Insulin-like Growth Factors and feto-placental Growth," *Placenta*, vol. 24, no.  
836 8–9, pp. 803–812, Sep. 2003.
- 837 [97] N. Ferrara *et al.*, "Heterozygous embryonic lethality induced by targeted inactivation of the VEGF  
838 gene," *Nat. 1996 3806573*, vol. 380, no. 6573, pp. 439–442, Apr. 1996.
- 839 [98] M. M. Ouseph *et al.*, "Atypical E2F Repressors and Activators Coordinate Placental  
840 Development," *Dev. Cell*, vol. 22, no. 4, pp. 849–862, Apr. 2012.
- 841 [99] A. Sawada, H. Kiyonari, K. Ukita, N. Nishioka, Y. Imuta, and H. Sasaki, "Redundant Roles of  
842 Tead1 and Tead2 in Notochord Development and the Regulation of Cell Proliferation and  
843 Survival," *Mol. Cell. Biol.*, vol. 28, no. 10, pp. 3177–3189, 2008.
- 844 [100] X. Ren *et al.*, "FOXF1 Transcription Factor Is Required for Formation of Embryonic Vasculature  
845 by Regulating VEGF Signaling in Endothelial Cells," *Circ. Res.*, vol. 115, no. 8, p. 709, 2014.
- 846 [101] X. Yang, C. Li, X. Xu, and C. Deng, "The tumor suppressor SMAD4/DPC4 is essential for  
847 epiblast proliferation and mesoderm induction in mice," *Proc. Natl. Acad. Sci. U. S. A.*, vol. 95,  
848 no. 7, pp. 3667–3672, Mar. 1998.
- 849 [102] X. Yang *et al.*, "Angiogenesis defects and mesenchymal apoptosis in mice lacking SMAD5,"  
850 *Development*, vol. 126, no. 8, pp. 1571–1580, Apr. 1999.
- 851 [103] X. Ye *et al.*, "LPA3-mediated lysophosphatidic acid signalling in embryo implantation and  
852 spacing," *Nat. 2005 4357038*, vol. 435, no. 7038, pp. 104–108, May 2005.
- 853 [104] R. R. Starks, H. Kaur, and G. Tuteja, "Mapping cis-regulatory elements in the midgestation  
854 mouse placenta," *Sci. Reports 2021 111*, vol. 11, no. 1, pp. 1–13, Nov. 2021.
- 855 [105] K. Theiler, "The House Mouse," *The House Mouse*, 1989.
- 856 [106] S. Andrews, "FastQC - A quality control tool for high throughput sequence data.," *Babraham*  
857 *Bioinforma.*, 2010.
- 858 [107] A. M. Bolger, M. Lohse, and B. Usadel, "Trimmomatic: A flexible read trimming tool for Illumina  
859 NGS data," 2014. [Online]. Available: <http://www.usadellab.org/cms/?page=trimmomatic>.  
860 [Accessed: 15-Feb-2021].
- 861 [108] N. L. Bray, H. Pimentel, P. Melsted, and L. Pachter, "Near-optimal probabilistic RNA-seq  
862 quantification.," *Nat. Biotechnol.*, vol. 34, no. 5, pp. 525–7, 2016.
- 863 [109] F. Cunningham *et al.*, "Ensembl 2019," *Nucleic Acids Res.*, vol. 47, no. D1, pp. D745–D751, Jan.  
864 2019.

- 865 [110] R Core Development Team, "R: A Language and Environment for Statistical Computing."  
866 Vienna, Austria, 2013.
- 867 [111] R. Wehrens and J. Kruisselbrink, "Flexible self-organizing maps in kohonen 3.0," *J. Stat. Softw.*,  
868 vol. 87, no. 7, pp. 1–18, Oct. 2018.
- 869 [112] G. Wacquet, É. Poisson-Caillault, and P. A. Hébert, "Semi-supervised K-way spectral clustering  
870 with determination of number of clusters," in *Studies in Computational Intelligence*, 2013, vol.  
871 465, pp. 317–332.
- 872 [113] H. Pimentel, N. L. Bray, S. Puente, P. Melsted, and L. Pachter, "Differential analysis of RNA-seq  
873 incorporating quantification uncertainty," *Nat. Methods*, vol. 14, no. 7, pp. 687–690, Jun. 2017.
- 874 [114] L. Yi, H. Pimentel, N. L. Bray, and L. Pachter, "Gene-level differential analysis at transcript-level  
875 resolution," *Genome Biol.*, vol. 19, no. 1, Apr. 2018.
- 876 [115] C. Sonesson, M. I. Love, and M. D. Robinson, "Differential analyses for RNA-seq: Transcript-level  
877 estimates improve gene-level inferences [version 2; referees: 2 approved]," *F1000Research*, vol.  
878 4, p. 1521, Feb. 2016.
- 879 [116] H. Hu, Y. R. Miao, L. H. Jia, Q. Y. Yu, Q. Zhang, and A. Y. Guo, "AnimalTFDB 3.0: A  
880 comprehensive resource for annotation and prediction of animal transcription factors," *Nucleic  
881 Acids Res.*, vol. 47, no. D1, pp. D33–D38, Jan. 2019.
- 882 [117] P. Shannon *et al.*, "Cytoscape: A software Environment for integrated models of biomolecular  
883 interaction networks," *Genome Res.*, vol. 13, no. 11, pp. 2498–2504, Nov. 2003.
- 884 [118] G. Yu, L.-G. Wang, Y. Han, and Q.-Y. He, "clusterProfiler: an R Package for Comparing  
885 Biological Themes Among Gene Clusters," <https://home.liebertpub.com/omi>, vol. 16, no. 5, pp.  
886 284–287, May 2012.
- 887 [119] M. Carlson, "org.Mm.eg.db: Genome wide annotation for Mouse." R package, 2019.
- 888 [120] Y. Liao, J. Wang, E. J. Jaehnig, Z. Shi, and B. Zhang, "WebGestalt 2019: gene set analysis  
889 toolkit with revamped UIs and APIs," *Nucleic Acids Res.*, vol. 47, no. W1, pp. W199–W205, Jul.  
890 2019.
- 891 [121] J. Canfield *et al.*, "Decreased LIN28B in preeclampsia impairs human trophoblast differentiation  
892 and migration," *FASEB J.*, vol. 33, no. 2, p. 2759, 2019.

893
